# Supplementary material
Source: PubMed Central journal article supplement (PMC3928064)
Supplement: NIHMS546876-supplement-Supplement.pdf [file NIHMS546876-supplement-Supplement.pdf]

## Supplementary Materials

### How the review was conducted

We began this review with a systematic literature search to supplement the literature library collected by one of the authors (MHT) over the past 20 years. We examined Pubmed for key words or abstract terms of child abuse, maltreatment, [early life stress](#), sexual abuse, physical abuse, witnessing domestic violence crossed with psychiatric illness, mental illness, depression, PTSD, substance abuse, bipolar disorder, anxiety disorders, panic disorder, generalized anxiety disorder, specific phobias, social phobia, eating disorders, personality disorders, borderline personality disorder, antisocial personality disorder and psychosis. The primary focus was on the last 5 years. Based on the large and varied number of references retrieved we then selected criteria for inclusion in meta-analyses.

First, we limited the exposure criteria to either childhood sexual abuse, as a particularly potent and well-studied form of maltreatment, or a composite exposure measure, such as an ACE score, that included CSA. Second, we required that the sample be large (N greater than 800 for cross-sectional studies, N greater than 500 for longitudinal studies). Third, we required that the subjects were drawn from a non-psychiatric sample. Fourth, that the study was published in English, and finally that the study provided odds ratios with confidence intervals, or sufficient data to calculate these parameters for inclusion in the meta-analysis statistics. When these parameters were set we extended the search backwards, and included additional studies found in citations from the collected articles. Initially we covered the entire array of DSM diagnosis reported to be associated with childhood abuse. Then, upon the recommendation of a reviewer we focused on the array of common and moderately heritable disorders selected (major depressive disorder, substance abuse, anxiety

disorders and posttraumatic stress). Key aspects of the selected studies are summarized in Supplementary Tables 1-3 for depression, PTSD and anxiety disorders and drug and alcohol use disorders, respectively.

Altogether, we identified 36 cross-sectional studies (N= 155,837 excluding overlap between studies examining the same sample) that met criteria for inclusion in the major depression category (Table S1). Similarly, 25 cross-sectional studies met criteria in the PTSD and anxiety disorder category (N= 104,322) (Table S2), and 37 cross-sectional studies (N= 244,887) met criteria for inclusion in drug or alcohol use and abuse category (Table S3).

The number of prospective studies was substantially smaller, though the study by Spataro (173) markedly increased the recorded sample size. This study assessed risk by examining confirmed cases of sexual abuse through the Victorian (Australia) Institute of Forensic Medicine records, which rendered all such decisions, and subsequent psychiatric diagnoses listed in the Victorian Psychiatric Case Registrar that recorded all contacts with public in-patient and community mental health services and contained over 500,000 names. This information was coupled with Australian Bureau of Statistics records for this region over the same time period to provide a population-based prospective assessment of risk for 3,141,357 individuals.

Altogether, 8 prospective studies (N = 3,149,066) met criteria for depression, 5 met criteria (N = 9,014) for drug or alcohol abuse, and 7 met criteria (N = 3,151,351) for posttraumatic stress or anxiety disorders.

We created Forest plots to compare results from studies providing adjusted and unadjusted odds ratios. As the paper further progressed, we were encouraged to focus on the emerging theory of ecophenotypes and to consider placing supporting statistical tables in an on-line supplement. The final literature review that the submission was based upon was current as of [April 1, 2013](#).

We also crossed the array of maltreatment descriptors with imaging, MRI, hippocampus, corpus callosum, amygdala, cortex, gray matter, white matter. Additional searches were run crossing the array of maltreatment categories with family history and with treatment. These reviews covered all years.

### **Meta-Analyses**

Odds ratios were analyzed using mixed-effect models with both fixed effect and random effect outcomes. Fixed effect outcomes provide composite results specific to the selected group of studies and assume that the studies are assessing the same effect. Random effect models provide composite results that assume heterogeneity between studies, which is certainly the case as the studies differed in severity of exposure, outcome measures and methodology. There is considerable debate between statisticians on which is the better model to use as they both involve tradeoffs. Hence, results from both models are presented. For many of the comparisons the results are nearly identical suggesting that statistical heterogeneity was not a serious problem in these cases. Results differed most strongly in the analysis of prospective studies on alcohol use and abuse, which is understandable given the small number of studies available and marked differences in effect measures for Widom et al (174) versus Cutajar et al (175). Cutajar et al (175) is perhaps the more reliable given the much greater number of exposed cases (N = 2,759 versus N = 85) with confirmed

childhood sexual abuse.

Studies often provided results broken down by exposure severity levels (e.g., non-consensual touch versus forced intercourse). Odds ratios were pooled across severity levels to provide an effect measure commensurate with the broadest definition of sexual abuse. If different types of exposure were reported we selected the category most specifically related to sexual abuse (e.g., presence or absence of sexual abuse versus ACE score). If multiple outcomes were presented we included the most serious result in the meta-analysis (e.g., drug abuse versus use of illicit drugs). For the Forest plots we included up to 2 outcomes, if one represented a current outcome measure (color-coded red) and the other a lifetime outcome (color-coded blue) on Figure 1. Odds ratios for these two outcomes within each study were pooled for the meta-analysis, and only included once in the sample size determination. Separate results for males and females were also pooled for the sake of simplicity.

As illustrated in Figure 1A we identified 13 large N cross-sectional studies that provided unadjusted odds ratios for the association between childhood sexual abuse or composite exposure measures and risk for various types of depression-related outcomes. The fixed and random effect models provided very similar composite odds ratio estimates of 2.6 and 2.7 respectively. The 95% confidence intervals were slightly larger for the random effects model. Estimated odds were lower, though still highly significant, in the group of studies that adjusted odds ratios for additional risk factors such as sociodemographics and family history. These 23 studies provided a composite estimated odds ratio of 2.1 or 2.2, with 95% confidence intervals of 2.0 – 2.5 for the random effects model. Similarly, analysis of the 8 prospective studies provided an estimated composite odds ratio of 2.1 (95% CI, 1.7 – 2.6, random effects model). Hence, meta-analysis shows that broadly-defined

childhood sexual abuse doubles the odds of developing a depressive disorder outcome. While some of the individual studies showed a non-significant difference (as indicated by a lower 95% confidence interval less than 1), the overall results were highly significant and no study showed a significant protective effect (i.e., upper 95% confidence interval less than 1).

Figures 1B and 1C provide the Forest Plot for the association between exposure and odds of developing PTSD and other anxiety disorders. In this case the studies were delineated by the nature of the reported outcome, and adjusted, unadjusted and prospective studies within a diagnostic category were combined into a single composite measure. We identified 14 studies that assessed the association between exposure and risk for current or lifetime PTSD. These studies provided a composite odds ratio of 4.4 for both the fixed and random effects models. Confidence intervals were wider for the random effects model and ranged from 3.6 – 5.2. Overall, exposure to sexual abuse broadly defined (or multiple exposure measure including sexual abuse) more than quadrupled the odds of developing posttraumatic stress disorder, and these were the highest odds for the different outcomes we examined.

Altogether, 17 studies reported the association between exposure to childhood sexual abuse and development of any anxiety disorder, or a suprathreshold anxiety score on a rating instrument (Fig 1C). The composite random effects odd ratio was 2.4 (95% CI 2.1 – 2.8). Random effects odds ratios were 1.8 (95% CI 1.3–2.5) for generalized anxiety disorder, 2.4 (95% CI 1.7-3.5) for panic disorder and 1.9 (95% CI 1.3–2.9) for simple or social phobias.

The Forest Plot for alcohol use disorders is illustrated in Figure 1D. Reported outcomes included

heavy episodic (binge) drinking, alcohol abuse and dependence. Altogether, analyzable data was extracted from 8 large N cross-sectional studies with unadjusted odds ratios, 20 cross-sectional studies with adjusted odds ratios, and 3 prospective studies. Random effect odds ratios and 95% confidence intervals were 1.9 (1.5–2.3), 1.7 (1.5–1.9) and 2.0 (0.8–4.9), respectively.

Figure 1E shows the Forest Plot for the association between exposure and risk for substance use disorders (excluding alcohol abuse). We identified 10 cross-sectional studies that provided unadjusted odds ratios, 16 cross-sectional studies with adjusted odds ratios and 4 prospective studies. Most of the studies reporting odds ratios for drug use and abuse had also reported odds ratios for alcohol use disorders. Random effect odds ratios and 95% confidence intervals were 2.8 (1.9–4.2), 2.0 (1.8–2.4) and 2.3 (1.3–4.3), respectively.

### **Maltreatment Ecophenotypes versus Developmental Trauma Disorder**

Developmental trauma disorder has been advanced as an integrated and developmentally-sensitive strategy for the diagnosis and treatment of individuals with maltreatment-related psychopathology (52). This approach emerged from Judy Herman's groundbreaking work on the long-lasting effects of exposure to prolonged interpersonal trauma in situations such as entrapment or captivity (176). Symptoms seen following prolonged trauma include a sense of loss of control, helplessness, impaired emotion regulation, somatization, disturbed self-perception and perception of others, as well as dissociation. This type of complex posttraumatic stress reaction was also recognized to be present in many individuals with chronic maltreatment histories (52, 54). Complex PTSD, also referred to as Disorders of Extreme Stress Not Otherwise Specified, was considered for inclusion in DSM-IV but was not included as 92% of individuals with complex PTSD met established diagnostic criteria for

PTSD (60).

Developmental trauma disorder evolved from complex PTSD by focusing on chronic maltreatment as the necessary stressor and coupling this with many of the clinical features of complex PTSD (e.g., affective dysregulation, somatic symptoms, and altered attributions and expectancies). The advantage of focusing on maltreatment as the stressor is that the majority of maltreated children do not meet diagnostic criteria for PTSD, providing a *raison d'être* for inclusion in the DSM that complex PTSD lacks. However, there are three major reasons why chronically maltreated individuals with significant psychopathology do not meet criteria for PTSD. First, some maltreated individuals show all the symptoms of PTSD but fail to meet criteria as the type of maltreatment they experienced (e.g., emotional abuse) does not fulfill the DSM A1 criteria for a traumatic event. This problem is most readily addressed by expanding the A1 criteria to include events that turn out to be traumatizing to children. Second, some maltreated children fail to meet criteria, as they may show symptoms in only two of three DSM-IV category clusters, but are as impaired as children meeting full criteria (51). Again, this is easily addressed by modifying the required number of symptom clusters for children. Finally, most maltreated individuals with psychopathology fail to meet criteria for PTSD because the symptoms they manifest are simply not the symptoms of PTSD. These individuals are better characterized as suffering from major depression, social anxiety disorder, alcohol use disorder, etc. Although maltreatment may be an important consideration in all of these cases there are good reasons for not lumping them together.

Developmental trauma disorder makes the assumption that there is basically one overarching psychiatric reaction to chronic childhood maltreatment. What we see instead is that childhood

maltreatment is a major risk factor for a host of different psychiatric disorders. There is not a single developmental trauma disorder but an array of developmental trauma disorders, or more accurately maltreatment-related psychiatric disorders. As we described in the article, these different outcomes likely depend on type, timing, severity and multiplicity of exposure, coupled with genetic and interpersonal risk and resilience factors.

From this perspective developmental trauma disorder overlaps extensively with the maltreatment-related PTSD ecophenotype, particularly if diagnostic criteria for PTSD are modified to make them more developmentally sensitive. However, there are several other maltreatment-related ecophenotypes with distinctly different clinical presentations. Hence, we propose that these maltreatment-related ecophenotypes continue to be labeled by the best fitting and most appropriate current DSM diagnostic codes, with the addition of a specifier to denote the individual's prior history of significant childhood maltreatment.

### **Strategies for subgrouping by ecophenotype**

There are two viable methods for identifying and delineating patients with ecophenotypic variants within the DSM-5 for each of the reviewed disorders and maybe others depending on what future research reveals.

The simplest, and least controversial would be to denote the **ecophenotype** by adding it a specifier to the different disorders. For major depression current specifiers include: With Mixed Features; Catatonic Features; Melancholic Features; Atypical Features; Seasonal Pattern; and Postpartum



Onset. It would be relatively easy to include as another specifier – With ‘Maltreatment History’ or perhaps more euphemistically – With ‘Early Life Stress’. Similarly, ‘With Maltreatment History’ could be added as a specifier to Substance Use Disorder, Alcohol Use Disorder, Posttraumatic Stress Disorder, etc. A specifier in DSM-5 serves to define a more homogeneous subgrouping of individuals with the disorder who share common features. Maltreated individuals certainly share a history of early life stress and important clinical features such as earlier onset, more severe course, poorer response to certain treatments, heightened risk for comorbidities and increase risk for suicide attempts.

The second alternative would be to designate "with childhood maltreatment" as a specific subtype within each DSM category. A good example is the DSM-5 PTSD category, which lists the following subtypes: Subtype: Posttraumatic Stress Disorder in Preschool Children and Subtype: Posttraumatic Stress Disorder – With Prominent Dissociative (Depersonalization/Derealization) Symptoms. Hence, within the different category clusters there could be Subtype: Major Depression in Individuals with Childhood Maltreatment, Subtype: Substance Use Disorder in Individuals with Childhood Maltreatment. DSM-5 subtypes define mutually exclusive and jointly exhaustive phenomenological subgroupings within a diagnosis.

At the present time we believe that there is ample evidence to justify adding ‘With Maltreatment History’ or ‘With Early Life Stress’ as a specifier to: major depressive disorder, dysthymia, generalized anxiety disorder, panic disorder, simple phobias, social anxiety disorder, obsessive compulsive disorder, posttraumatic stress disorder and drug and alcohol use disorders.

Determining whether or not they are distinct subtypes would follow the strategy outlined by Robins and Guze (1977). They described a method for achieving diagnostic validity in psychiatric illness, which consisted of 5 phases: clinical description, laboratory study, exclusion of other disorders, follow-up study, and family study. This is the approach we followed in providing the initial evidence base for these ecophenotypes. This approach was expanded on by DSM-5 members, which recommended organizing supporting data for diagnostic categories or subtypes into antecedent validators (family history, sociodemographic and cultural factors, environmental risk factors, prior psychiatric history), concurrent validators (cognitive, emotional, temperament, and personality correlates unrelated to diagnostic criteria, biological markers, comorbidities) and predictive validators (diagnostic stability, course of illness, response to treatment) (1978).

To fully establish the evidence base for these ecophenotypes as distinct subtypes will require the following types of studies. To satisfy the *clinical description* and *exclusion of other disorders* criteria we need more studies identifying the clinical characteristic of the maltreated ecophenotype with the specific delineation of clinical features that differentiate between maltreated and non-maltreated individuals with the same primary diagnosis. For the *laboratory studies criteria* we need additional neuroimaging and other types of neurobiological investigations (e.g., neuroendocrine, epigenetic) comparing the ecophenotype to the non-maltreated variant. Ideally, these studies would also include unexposed controls and resilient maltreated individuals without psychopathology. The goal would be to identify potential biomarkers for the ecophenotype. Similarly, *family studies* would focus on gene by maltreatment interactions that differentiate the ecophenotype from the non-maltreated subtype. Finally, the *follow-up study* criteria would include treatment trials comparing maltreated and non-

maltreated patients with the same primary diagnosis that may elucidate important differences in therapeutic response, course of illness and diagnostic stability.

Table S1. Odds of developing depressive disorders in individuals exposed to childhood sexual abuse or multiple forms of maltreatment including sexual abuse.

| First Author (Reference)       | Types of Maltreatment                                                                                                                                | Clinical Outcome                         | Method                          | N    | Age Range | Restrictions Location                    | Odds Ratio (95% CI)*                                                                                      | Model |
|--------------------------------|------------------------------------------------------------------------------------------------------------------------------------------------------|------------------------------------------|---------------------------------|------|-----------|------------------------------------------|-----------------------------------------------------------------------------------------------------------|-------|
| <b>Cross-sectional Studies</b> |                                                                                                                                                      |                                          |                                 |      |           |                                          |                                                                                                           |       |
| Fergusson (179)                | 1 Non-contact sexual activity<br>2 Contact w/o penetration<br>3 Penetration or attempt. All < 16 y                                                   | a Major depression between ages 16-18    | Interview (CIDI)                | 1019 | 18        | Christchurch, NZ Longitudinal evaluation | 3.6 (1.3–9.6) 1a<br>3.0 (1.4–6.1) 2a<br>5.4 (2.4–12.3) 3a<br><i>Pooled CSA</i><br>3.59 (2.24–5.75)        | aOR   |
| Wilsnack (180)                 | Unwanted familial sexual activity < 18 y or w ≥ 5 y older individual or unwanted extrafamilial sexual activity < 18 y or < 13 y w ≥ 5 y older person | Lifetime Major depressive disorder       | Interview (DIS)                 | 1099 | 21-UUA    | Females US National                      | 2.51 (1.69-3.74)                                                                                          | aOR   |
| McCauley (181)                 | Ever sexually abused and/or physically abused < 18 y but not after 18 years                                                                          | High v. low depression score             | SR Survey SCL-22                | 1931 | 18-UUA    | Females Baltimore primary care sample    | 2.73 (1.87–3.98)                                                                                          | OR    |
| Dinwiddie (182)                | Forced into sexual activity, including intercourse < 18 y                                                                                            | Lifetime Major depressive disorder       | Telephone Interview (SSAGA)     | 5959 | 27-90     | Female twins Australia National          | 2.68 (2.08-3.44)                                                                                          | OR    |
| Kendler (8)                    | 1 Non-genital<br>2 Genital touch or view<br>3 Intercourse or attempt. All < 16 y                                                                     | a Lifetime Major depressive disorder     | Interview (SCID DSMIIIR)        | 1411 | 17-55     | F twins Virginia population              | 1.12 (0.69-1.80) 1a<br>1.53 (1.06–2.19) 2a<br>2.80 (1.69–4.64) 3a<br><i>Any CSA</i><br>1.72 (1.30–2.26) a | aOR   |
| Molnar (183)                   | 1 Raped or molested < 18 years                                                                                                                       | a Lifetime MDD<br>b Lifetime dysthymia   | Interview (CIDI)                | 5866 | 15-54     | US National Comorbidity Study            | 1.80 (1.42–2.28) 1a<br>1.80 (1.29–2.53) 1b<br><i>Pooled M and F</i>                                       | aOR   |
| MacMillan (34)                 | Unwanted exposure, threats, touching attempted sex or attack w adult while “growing up”                                                              | Lifetime Major depressive disorder       | Interview (CIDI)                | 7016 | 15-64     | Ontario Canada probability sample (OHS)  | 3.4 (2.3–4.8)                                                                                             | aOR   |
| Hanson (184)                   | 1 Rape ± aggravated assault < 18 y v neither                                                                                                         | a Lifetime MDD<br>b Current MDD          | Telephone interview SCID-depr   | 4008 | 18-UUA    | Females US National Survey               | 2.89 (2.31–3.63) 1a<br>3.27 (2.18–4.90) 1b                                                                | OR    |
| Chapman (185)                  | 1 Touch, attempt or penetration < 18 y with person ≥ 5 yrs older from ACE                                                                            | a Lifetime<br>b Current MDD or dysthymia | SR (2 items DIS, 6 items CES-D) | 9460 | 19-94     | San Diego HMO sample                     | 1.74 (1.54–1.96) 1a<br>1.90 (1.66–2.17) 1b<br><i>Pooled M and F</i>                                       | aOR   |
| Tanskanen (186)                | CSA (incest, pedophilia) by family member(s) or stranger(s) during                                                                                   | Persistent depression, 2 years           | BDI medication or diagnosis     | 1405 | 25-64     | Finland stratified population sample     | 2.63 (1.40–4.93)                                                                                          | OR    |

|                 |                                                                                                      |                                               |                                         |                                 |                                                                |                                                 |                                                                                            |     |
|-----------------|------------------------------------------------------------------------------------------------------|-----------------------------------------------|-----------------------------------------|---------------------------------|----------------------------------------------------------------|-------------------------------------------------|--------------------------------------------------------------------------------------------|-----|
|                 | your childhood                                                                                       |                                               |                                         |                                 |                                                                |                                                 |                                                                                            |     |
| Libby (187)     | CSA, rape, unwanted sex, forced touch < 13 y                                                         | Lifetime Depression or dysthymia              | Interview (CIDI)                        | 3084                            | 15-54                                                          | American Indians, 2 tribes                      | 4.07 (2.77–5.99)<br><i>Pooled across tribes</i>                                            | aOR |
| Hussey (188)    | Touched, forced to touch or forced sex by parents or other adult-care givers < 6 <sup>th</sup> grade | Current Major depressive disorder             | SR (CES-D cutoff 22/24)                 | 10828                           | 18-26                                                          | US National (Add Health)                        | 1.58 (1.25–2.01)                                                                           | OR  |
| Schneider (189) | Unwanted sexual activity force or threat < 18 years                                                  | Frequent sadness past 30 days                 | Telephone interview Healthy Days Screen | 3936                            | 18-94                                                          | Females California (CWHS)                       | 2.56 (2.02–3.26)                                                                           | aOR |
| Affi (190)      | Intercourse or penetration w force or threat or unwanted touch < 16 years                            | Any mood disorder lifetime                    | Interview (CIDI)                        | 9291                            | 18-UUA                                                         | US (NCS-R)                                      | 1.87 (1.51–2.31)                                                                           | aOR |
| Zlotnick (191)  | 1 Potentially traumatic childhood event including rape < 15 y v no exposure                          | a Lifetime MDD<br>b Lifetime dysthymia        | Interview (DIS) (CIDI)                  | 2390                            | 15-UUA                                                         | Chile National                                  | 1.4 (0.9-2.2) 1a<br>2.1 (1.3-3.3) 1b                                                       | aOR |
| Bonomi (192)    | Unwanted touch or made to touch < 18 years ± CPA                                                     | Current severe depressive symptoms            | Telephone Interview (CES-D 5 item ≥ 6)  | 3568                            | 18-64                                                          | Females northern Idaho and Washington State GHC | 1.89 (1.58–2.26)                                                                           | aOR |
| Rohde (193)     | Unwanted touch or made to touch or forced threatened sex < 18 y (modified CTQ)                       | Current moderately severe depressive symptoms | Telephone Interview (PHQ-9 ≥ 10)        | 4641 overlaps w (192)           | 40-65                                                          | Females northern Idaho and Washington State GHC | 2.14 (1.62–2.83)                                                                           | aOR |
| Draper (194)    | Victim of any sexual abuse ± physical abuse < 15 years                                               | Current depression                            | Postal survey (PHQ -9 ≥ 15)             | 21822                           | 60-UUA                                                         | Australia, general medical practice             | 3.49 (2.82–4.33)                                                                           | aOR |
| Fletcher (195)  | Touched, forced to touch or forced sex by parents or other adult-care givers < 6 <sup>th</sup> grade | Current depression at age 17 or 22            | SR (CES-D cutoff 22/24)                 | 14240<br>14228 overlaps w (188) | ~ 17 (7 <sup>th</sup> -12 <sup>th</sup> grade)<br>~ 22 (18-26) | US National (Add Health Waves I, III)           | 1.77 (1.20–2.62) 17<br>1.88 (1.29–2.72) 22<br><i>Pooled across age</i><br>1.83 (1.39–2.39) | aOR |
| Ritchie (196)   | CSA and/or CPA unspecified criteria                                                                  | Current late-life Major depressive disorder   | Interview (MINI)                        | 942                             | 65-92                                                          | Montpellier France random sample                | 2.67 (0.9–7.90)                                                                            | OR  |
| Polanczyk (197) | 1 Childhood maltreatment (CTQ) none v moderate + severe                                              | a Current MDD (past yr)<br>b Recurrent MDD    | Interview (DIS)                         | 924                             | 26-55                                                          | Mothers of twins UK National (E-risk)           | 3.49 (2.41–5.06) 1a<br>4.05 (2.76–5.95) 1b                                                 | OR  |
| Brezo (198)     | Touch, attempt or penetration < 18 years from ACE                                                    | Lifetime DSM-IIIIR Mood disorder              | Interview (DIS)                         | 1121                            | 27                                                             | Quebec French speaking population               | 3.11 (2.05–4.72)                                                                           | OR  |
| Green (3)       | Repeated fondling, attempted rape, and rape < 18 years                                               | Lifetime DSM-IV Mood disorder                 | Interview (CIDI)                        | 9282 overlaps w                 | 18~ UUA                                                        | US National (NCS-R)                             | 1.8 (1.6-2.0) bivariate                                                                    | aOR |

|                |                                                                                    |                                                                 |                                                | (190)                    |           |                                                      |                                                                                      |     |
|----------------|------------------------------------------------------------------------------------|-----------------------------------------------------------------|------------------------------------------------|--------------------------|-----------|------------------------------------------------------|--------------------------------------------------------------------------------------|-----|
| Cannon (199)   | Unwanted touch or made to touch < 18 y and/or CPA ± WDV                            | Current Severe Major depressive disorder                        | SR (abbreviated CES-D cutoff $\geq 6$ )        | 3568                     | 18-64     | Females northern Idaho and Washington State GHC      | 1.99 (1.66–2.39)<br><i>Pooled across WDV exposure</i>                                | aOR |
| Gal (200)      | 1 CSA raped or molested < 13 years or 13-17 years                                  | a Lifetime depressive DO<br>b Current depressive DO (past year) | Interview (CIDI)                               | 3978                     | 21-UUA    | Israel National Health Service Jewish sample         | 1.92 (1.30–2.84) 1a<br>1.60 (0.95–2.70) 1b<br><i>Pooled preteen and teen CSA</i>     | OR  |
| Ramiro (201)   | ACE Score > 0 v = 0                                                                | Depression                                                      | SR (ACE Survey)                                | 1068                     | 35-92     | Metro Manila, Philippines                            | 2.47 (1.82–3.33)                                                                     | aOR |
| King (202)     | Exposure, touch ± force, penetration or intercourse < 18 years                     | Affective disorder past 6 month                                 | Interview (DISC)                               | 1735                     | 10-18     | Cook County IL. Juvenile Detention Center stratified | 2.26 (1.35-3.77)<br><i>Pooled sexual abuse ± severe physical abuse</i>               | OR  |
| Jonas (203)    | 1 Non-consensual touch<br>2 Non-consensual intercourse                             | a Depressive episode past week                                  | Interview (CIS-R)                              | 7403                     | 16~ UUA   | England National (APMS)                              | 3.08 (2.0–4.8) 1a<br>5.07 (2.7–9.6) 2a<br><i>Pooled exposure</i><br>3.62 (2.52–5.19) | OR  |
| Teicher (204)  | Forced unwanted sexual contact < 18 y, controlling for other forms of maltreatment | Current severe depressive symptoms                              | Online survey, Kellner SQ Depression $\geq 12$ | 1412                     | 18-25     | Boston, convenience sample                           | 1.85 (1.33–2.57)                                                                     | aOR |
| Fujiwara (205) | Rape, attempt or repeated fondling < 18 y controlling for other forms of adversity | First onset mood disorder                                       | Interview (CIDI)                               | 1722                     | 20-UUA    | Japan, National Survey                               | 1.5 (0.3–5.2)                                                                        | aOR |
| Chou (206)     | 1 Non-consensual touch or intercourse < 16 years                                   | a Depressive episode<br>b Mixed depression anxiety past week    | Computer-assisted self interview               | 3493 overlaps with (203) | 50-UUA    | Middle-age or older England National (APMS)          | 1.88 (0.8–4.2) 1a<br>1.85 (1.2–2.8) 1b                                               | OR  |
| Sartor (207)   | Hi-risk exposure (eg CSA, physical abuse, severe neglect) v. no risk               | Lifetime major depressive disorder                              | Interview (SSAGA)                              | 2568                     | 38.6 ±4.7 | Twins and siblings Australia National                | 3.04 (2.34–3.95)                                                                     | OR  |
| Dunn (208)     | 1 Sexual assault<br>2 Rape < 18 years                                              | a Adolescent onset depression (exposure year or later)          | Interview (CIDI)                               | 5498 overlaps w (3, 190) | 18-99     | US National (NCS-R)                                  | 3.33 (2.6–4.3) 1a<br>3.50 (2.6–4.7) 2a<br><i>Pooled exposure</i><br>3.40 (2.81–4.12) | aOR |
| Gonzalez (209) | 1 Sexual contact, attempt or forced < 16 years                                     | Depression ± pain condition last 12 months                      | Interview (CIDI-SF)                            | 1475                     | 21-35     | Ontario CA population (OCHS)                         | 2.60 (1.41–4.80)                                                                     | aOR |
| Li (210)       | Exposure, peeping, touch, touching or intercourse < 14 years                       | Depression – single scale item past 6 months                    | Interview and computer-assisted self-interview | 4084                     | 15-24     | Taipei representative sample                         | 2.06 (1.46–2.91)                                                                     | aOR |

|                            |                                                                                                                                                                |                                                |                                                          |                                 |                 |                                                                                          |                                                                                                                  |     |
|----------------------------|----------------------------------------------------------------------------------------------------------------------------------------------------------------|------------------------------------------------|----------------------------------------------------------|---------------------------------|-----------------|------------------------------------------------------------------------------------------|------------------------------------------------------------------------------------------------------------------|-----|
| Warner (211)               | Sexual assault or rape < 18 years                                                                                                                              | Lifetime major depressive episode or dysthymia | Interview (CIDI)                                         | 1427                            | 18-UUA          | Hispanic Females US National (NLAAS)                                                     | 1.62 (0.91–2.87)                                                                                                 | aOR |
| <b>Prospective Studies</b> |                                                                                                                                                                |                                                |                                                          |                                 |                 |                                                                                          |                                                                                                                  |     |
| Brown (212)                | 1 CSA, Central Registry Abuse and Neglect or SR of $\geq$ 2 of the following touched, touching or sex play < 18                                                | a Dysthymia<br>b Major depression              | Interview (DISC)                                         | 639                             | 18-25           | Upstate NY Followed 15 years                                                             | 9.74 (2.79–34.3) 1a<br>3.22 (0.88–11.8) 1b                                                                       | OR  |
| Thornberry (213)           | Substantiated maltreatment CPS (including physical and sexual abuse; neglect; lack of supervision; moral, legal, and educational neglect; and emotional abuse) | Depressive symptoms > 1 SD from mean           | SR (14 item scale)                                       | 881 Early Adol<br>818 Late Adol | ~13<br>18       | Rochester NY stratified high-risk study<br><br>Early Adol<br>Late Adol<br>3 yr follow-up | 1.40 (0.99–1.95)<br>Early Adol<br>0.86 (0.59–1.25)<br>Late Adol<br><br><i>Pooled outcome</i><br>1.12 (0.87–1.45) | aOR |
| Spataro (173)              | Confirmed CSA < 16 by records of the Victorian Institute of Forensic Medicine                                                                                  | Major affective disorders lifetime             | Diagnoses from the Victorian Psych-iatric Case Registrar | 3141357                         | 27.1 $\pm$ 13.3 | Victoria, Australia 9 year follow-up                                                     | 3.18 (2.23–4.54)                                                                                                 | OR  |
| Widom (5)                  | Court substantiated abuse or neglect < 12                                                                                                                      | Current Major depressive disorder              | Interview (DIS)                                          | 1196                            | 19–40           | US, metropolitan Midwest, 22 yr follow-up                                                | 1.75 (1.01–3.02)                                                                                                 | aOR |
| Fergusson (214)            | 1 Non-contact sexual activity<br>2 Contact w/o penetration<br>3 Penetration or attempt. All < 16 y                                                             | a Major depressive disorder at 21–25 years     | Interview (CIDI)                                         | 1001 overlaps with (179)        | 21–25           | Christchurch, NZ 3 year follow-up                                                        | 2.47 (1.12–5.45) 1a<br>3.52 (1.99–6.26) 2a<br>3.08 (1.83–5.18) 3a<br><i>Pooled CSA</i><br>3.10 (2.19–4.38)       | OR  |
| Polanczyk (197)            | 1 Prospective caring, discipline + retrospective CSA<br>CPA < 18 y                                                                                             | a Current MDD (past y)<br>b Recurrent MDD      | Interview (DIS)                                          | 918                             | 32              | Dunedin sample, 30 yr follow-up                                                          | 1.61 (1.12–2.29) 1a<br>1.91 (1.35–2.71) 1b                                                                       | OR  |
| Cutajar (175)              | Confirmed CSA < 16 y by records of the Victorian Institute of Forensic Medicine                                                                                | Affective DO (ICD)                             | Diagnoses from the Victorian Psych-iatric Case Registry  | 5365 part of (173)              | 33.8 $\pm$ 11.0 | Victoria, Australia 12–43 year follow-up                                                 | 2.07 (1.59–2.70)                                                                                                 | OR  |
| Scott (2)                  | Primary client in CPS database plus retrospective assessment of sexual abuse, physical abuse or WDV < 17 y                                                     | Lifetime major depressive disorder             | Interview (CIDI)                                         | 2144                            | 16–27           | New Zealand National Survey 10 year follow-up                                            | 2.10 (1.32–3.35)                                                                                                 | aOR |

\*The number indicates which type of maltreatment and the letter indicates which clinical outcome the odds ratio applies to within a given study with multiple types of maltreatment or outcomes (e.g., Fergusson (179) 1a, 1 = Non-contact sexual activity, a = Major depression between ages 16–18).

Abbreviations: aOR – Odds ratio adjusted for covariates, Adol - Adolescence, APMS - Adult Psychiatric Morbidity Survey, CES-D - Center for Epidemiologic Studies Depression Scale, CIDI - World Health Organization Composite International Diagnostic Interview,

CIS-R - Clinical Interview Schedule – Revised, CPA - Childhood Physical Abuse, CPS – Child Protective Service or similar agency, CSA - Childhood Sexual Abuse, CTQ - Childhood Trauma Questionnaire, DIS - Diagnostic Interview Schedule, DISC - Diagnostic Interview Schedule for Children, DO - Disorder, DSM - Diagnostic and Statistical Manual of Mental Disorders, EA - Emotional Abuse, F - Female, GHC - Group Health Cooperative, ICD - International Classification of Disease, M - Male, MDD - Major Depressive Disorder, MINI - Mini-International Neuropsychiatric Interview, NCS-R – National Comorbidity Survey – Replication, NLAAS - National Latino and Asian American Survey, Negl - Neglect, OCHS – Ontario Child Health Study, OHS – Ontario Health Survey, OR – raw odds ratio, PHQ - Patient Health Questionnaire, PVA - Parental Verbal Abuse, RR - Relative Risk, SCID - Structured Clinical Interview for DSM Disorders, SR - Self-Report, SSAGA - Semi-Structured Assessment for the Genetics of Alcoholism, Sx - Symptoms, UUA - Unspecified Upper Age, WDV - Witnessing Interparental Violence, y – year.



Table S2. Odds of developing anxiety disorders or PTSD in individuals exposed to childhood sexual abuse or multiple forms of maltreatment including sexual abuse.

| First Author (Reference)       | Types of Maltreatment                                                                                                                                | Clinical Outcome                                                                                  | Method                              | N    | Age Range | Restrictions Location                    | Odds Ratio (95% CI)*                                                                                                                                                                                      | Model |
|--------------------------------|------------------------------------------------------------------------------------------------------------------------------------------------------|---------------------------------------------------------------------------------------------------|-------------------------------------|------|-----------|------------------------------------------|-----------------------------------------------------------------------------------------------------------------------------------------------------------------------------------------------------------|-------|
| <b>Cross-sectional Studies</b> |                                                                                                                                                      |                                                                                                   |                                     |      |           |                                          |                                                                                                                                                                                                           |       |
| Fergusson (179)                | 1 Non-contact sexual activity<br>2 Contact wo penetration<br>3 Penetration or attempt.<br>All < 16 years                                             | a Any anxiety disorder (excluding PTSD) between ages 16-18                                        | Interview (CIDI)                    | 1019 | 18        | Christchurch, NZ Longitudinal evaluation | 2.8 (1.1–7.1) 1a<br>3.0 (1.5–6.1) 2a<br>3.2 (1.5–6.7) 3a<br><i>Pooled CSA</i><br>3.02 (1.93–4.73)                                                                                                         | aOR   |
| Wilsnack (180)                 | Unwanted familial sexual activity < 18 y or w ≥ 5 y older individual or unwanted extrafamilial sexual activity < 18 y or < 13 y w ≥ 5 y older person | Current anxiety (single item)                                                                     | Interview (DIS)                     | 1099 | 21-UUA    | Females US National                      | 1.56 (1.02–2.40)                                                                                                                                                                                          | aOR   |
| McCauley (181)                 | Ever sexually abused and/or physically abused < 18 y but not after 18                                                                                | High v low anxiety score                                                                          | SCL-22                              | 1931 | 18-UUA    | Females Baltimore primary care sample    | 2.99 (2.00–4.46)                                                                                                                                                                                          | OR    |
| Dinwiddie (182)                | 1 Forced into sexual activity, including intercourse < 18 y                                                                                          | a Lifetime Social Phobia<br>b Lifetime Panic / Agoraphobia                                        | Telephone Interview (SSAGA)         | 3868 | 27-90     | Female twins Australia National          | 3.10 (1.81-5.31) 1a<br>4.22 (2.85-6.26) 1b                                                                                                                                                                | OR    |
| Kendler (8)                    | 1 Non-genital<br>2 Genital touch or view<br>3 Intercourse or attempt<br>All < 16 years                                                               | a Lifetime Panic / Agoraphobia<br>b Lifetime GAD                                                  | Interview (SCID - DSMIIIR)          | 1411 | 17-55     | Female twins Virginia population         | 1.21 (0.45-3.41) 1a<br>1.92 (0.93–3.94) 2a<br>2.62 (1.08–6.34) 3a<br>1.13 (0.6–2.1) 1b<br>1.32 (0.81–2.14) 2b<br>2.62 (1.67–4.65) 3b<br><i>Pooled any CSA</i><br>1.99 (1.12–3.52) a<br>1.62 (1.12–2.34) b | aOR   |
| Molnar (183)                   | 1 Raped or molested < 18 years                                                                                                                       | a PTSD<br>b Panic disorder<br>c GAD<br>d Simple Phobia<br>e Social Phobia<br>All lifetime history | Interview (CIDI)                    | 5866 | 15-54     | US National Comorbidity Study            | 9.23 (6.65–12.8) 1a<br>1.34 (0.94–1.92) 1b<br>1.22 (0.87–1.69) 1c<br>1.26 (0.90–1.77) 1d<br>1.43 (1.02–2.01) 1e<br><i>pooled results for males and females</i>                                            | aOR   |
| MacMillan (34)                 | Unwanted exposure, threats, touching attempted sex or attack w adult while “growing up”                                                              | Lifetime any anxiety disorder                                                                     | Interview (CIDI)                    | 7016 | 15-64     | Ontario Canada probability sample        | 2.0 (1.5–2.7)                                                                                                                                                                                             | aOR   |
| Hanson (184)                   | 1 Rape ± aggravated assault < 18 y v neither                                                                                                         | a Lifetime PTSD<br>b Current PTSD                                                                 | Telephone interview NWS PTSD module | 4008 | 18-UUA    | Females US National Survey               | 4.42 (3.43–5.69) 1a<br>4.48 (3.12–6.44) 1b                                                                                                                                                                | OR    |

|                 |                                                                                         |                                                                                                 |                                 |                          |            |                                                      |                                                                                                                 |     |
|-----------------|-----------------------------------------------------------------------------------------|-------------------------------------------------------------------------------------------------|---------------------------------|--------------------------|------------|------------------------------------------------------|-----------------------------------------------------------------------------------------------------------------|-----|
| Coid (215)      | Unwanted sex ± intercourse < 16 y controlling for other abuse and sexual assault > 16 y | Current PTSD                                                                                    | SR Survey (HADS)                | 716                      | 16-85      | Females UK community practitioner sample             | 2.48 (1.33–4.64)                                                                                                | aOR |
| Libby (187)     | 1 CSA, rape, unwanted sex, forced touch < 13 years                                      | a Lifetime PTSD<br>b Lifetime panic DO                                                          | Interview (CIDI)                | 3084                     | 15-54      | American Indians, 2 tribes                           | 10.36 (2.4–45.4) 1a<br>1.61 (1.25–2.08) 1b<br><i>Pooled across tribes</i>                                       | OR  |
| Goodwin (216)   | 1 Contact CSA < 16 years                                                                | a Panic attack<br>b Panic disorder                                                              | Interview (CIDI)                | 983 overlap with (179)   | 18 and 21  | Christ-church, NZ longitudinal evaluation            | 4.1 (2.3–7.2) 1a<br>2.2 (0.98–5.0) 1b                                                                           | aOR |
| Schneider (189) | 1 unwanted sexual activity force or threat < 18 year                                    | a Frequent anxiety past 30 days<br>b Probable PTSD                                              | Telephone Interview PTSD Screen | 3,936                    | 18-94      | Females California (CWHS)                            | 2.64 (2.14–3.25) 1a<br>5.71 (4.31–7.57) 1b                                                                      | aOR |
| Affi (190)      | Intercourse or penetration w force or threat or unwanted touch < 16 y                   | Any anxiety disorder lifetime                                                                   | Interview (CIDI)                | 5142 F<br>4149 M         | 18-<br>UUA | US National (NCS-R)                                  | 1.57 (1.24-2.00) F<br>1.52 (NS) M                                                                               | aOR |
| Zlotnick (191)  | 1 Potentially traumatic childhood event including rape < 15 y v no childhood exposure   | a Lifetime PTSD<br>b Lifetime Panic / Agoraphobia                                               | Interview (DIS) (CIDI)          | 2390                     | 15-<br>UUA | Chile National                                       | 5.62 (3.75–8.44) 1a<br>5.80 (3.07–11.0) 1b<br><i>Pooled no exposure and adult exposure</i>                      | OR  |
| Draper (194)    | Victim of any sexual abuse ± physical abuse < 15 years                                  | Current anxiety                                                                                 | Postal survey (HADS ≥ 11)       | 21822                    | 60-<br>UUA | Australia, general medical practice                  | 3.54 (3.05–4.10)                                                                                                | aOR |
| Cougler (7)     | 1 Raped or molested < 15 years                                                          | a Social anxiety DO<br>b Panic DO<br>c GAD<br>d PTSD<br>e Specific phobia<br>Lifetime diagnoses | Interview (CIDI)                | 4141 overlaps with (190) | 18~<br>UUA | US National (NCS-R)                                  | 1.85 (1.44–2.39) 1a<br>2.10 (1.46–3.03) 1b<br>1.62 (1.28–2.05) 1c<br>2.83 (2.19–3.65) 1d<br>0.95 (0.77–1.26) 1e | aOR |
| Tonmyr (217)    | Substantiated CSA < 15 years by CPS                                                     | Anxiety and/or depression                                                                       | Case worker notes               | 4381                     | 10-15      | Canada National Welfare System                       | 2.10 (1.36–3.25)                                                                                                | aOR |
| Gal (200)       | 1 Raped or molested < 13 years or 13-17 years                                           | a Lifetime anxiety disorder<br>b 12 month anxiety disorder                                      | Interview (CIDI)                | 3978                     | 21-<br>UUA | Israel National Health Service Jewish sample         | 2.43 (1.50–3.93) 1a<br>1.80 (0.98–3.30) 1b<br><i>Pooled preteen and teen CSA</i>                                | OR  |
| King (202)      | Exposure, touch ± force, penetration or intercourse < 18 years                          | Any anxiety disorder past 6 mo                                                                  | Interview (DISC)                | 1735                     | 10-18      | Cook County IL. Juvenile Detention Center stratified | 4.05 (2.47-6.65)<br><i>Pooled sexual abuse ± severe physical abuse</i>                                          | OR  |
| Jonas (203)     | 1 Non-consensual touch or intercourse pooled                                            | a Current PTSD<br>b GAD<br>c Panic disorder<br>d Phobias<br>e OCD<br>Past week b-e              | SR (TSQ) Interview (CIS-R)      | 7403                     | 16~<br>UUA | England National (APMS)                              | 4.23 (2.96–6.04) 1a<br>3.00 (2.24–4.03) 1b<br>3.19 (1.82–5.58) 1c<br>4.90 (3.18–7.55) 1d<br>3.73 (2.17–6.41) 1e | OR  |

|                            |                                                                                                       |                                                                     |                                                        |                          |                         |                                             |                                                                                                                 |     |
|----------------------------|-------------------------------------------------------------------------------------------------------|---------------------------------------------------------------------|--------------------------------------------------------|--------------------------|-------------------------|---------------------------------------------|-----------------------------------------------------------------------------------------------------------------|-----|
| Teicher (204)              | Forced unwanted sexual contact < 18 y controlling for other forms of maltreatment                     | Current severe anxiety symptoms                                     | Online survey, Kellner SQ Anxiety $\geq$ 12            | 1412                     | 18-25                   | Boston, convenience sample                  | 1.59 (1.14–2.22)                                                                                                | aOR |
| Fujiwara (205)             | Rape, attempt or repeated fondling < 18 y controlling for other forms of adversity                    | First onset anxiety disorder                                        | Interview (CID I)                                      | 1722                     | 20-UUA                  | Japan, National Survey                      | 1.4 (0.5–4.2)                                                                                                   | aOR |
| Walsh (218)                | 1 Forced or drug-related sexual contact, intercourse, or penetration                                  | a Lifetime PTSD<br>b Current PTSD – past 6 months                   | Telephone survey (NSA-PTSD module)                     | 1763                     | 12-17 adolescent sample | Female US National (NSA-R and NWS-R)        | 3.91 (2.77–5.52) 1a<br>4.24 (2.76–6.53) 1b                                                                      | aOR |
| Chou (206)                 | 1 Non-consensual touch or intercourse < 16 years                                                      | a PTSD<br>b GAD<br>c Panic DO<br>d Phobia<br>e OCD<br>All past week | Computer-assisted self interview                       | 3493 overlaps with (203) | 50-UUA                  | Middle-age or older England National (APMS) | 3.22 (1.62–6.39) 1a<br>2.06 (1.19–3.55) 1b<br>2.25 (0.72–7.03) 1c<br>2.62 (1.02–6.73) 1d<br>2.01 (0.54–7.55) 1e | OR  |
| Sartor (207)               | Hi-risk exposure (eg CSA, physical abuse, severe neglect) v low risk                                  | Lifetime PTSD                                                       | National Comorbidity Survey interview                  | 1643                     | 38.6 $\pm$ 4.7          | Twins and siblings Australia National       | 4.36 (3.25-5.85)                                                                                                | aOR |
| Li (210)                   | Exposure, peeping, touch, touching or intercourse < 14 years                                          | Anxiety – single scale item past 6 months                           | Interview and computer-assisted self-interview         | 4084                     | 15-24                   | Taipei representative sample                | 2.00 (1.46–2.73)<br><i>Pooled across contact and non-contact CSA</i>                                            | aOR |
| Warner (211)               | Sexual assault or rape < 18 years                                                                     | Any anxiety disorder lifetime                                       | Interview (CID I)                                      | 1427                     | 18-UUA                  | Hispanic Females US National (NLAAS)        | 2.87 (1.70–4.85)                                                                                                | aOR |
| <b>Prospective Studies</b> |                                                                                                       |                                                                     |                                                        |                          |                         |                                             |                                                                                                                 |     |
| Widom (219)                | Court substantiated CSA < 12 years                                                                    | Lifetime PTSD                                                       | Interview (DIS)                                        | 1196                     | 19-40                   | US, metropolitan Midwest, 20 yr follow-up   | 2.34 (1.5–3.7)                                                                                                  | OR  |
| Spataro (173)              | Confirmed CSA < 16 y by records of the Victorian Institute of Forensic Medicine                       | Anxiety and acute stress disorders lifetime                         | Diagnoses from the Victorian Psychiatric Case Registry | 3141357                  | 27.1 $\pm$ 13.3         | Victoria, Australia 9 year follow-up        | 3.18 (2.23–4.54)                                                                                                | OR  |
| Fergusson (214)            | 1 Non-contact sexual activity<br>2 Contact wo penetration<br>3 Penetration or attempt. All < 16 years | a Met criteria for one or more anxiety disorders at 21-25 years     | Interview (CID I)                                      | 1001 extension of (214)  | 21-25                   | Christchurch, NZ 3 year follow-up           | 0.90 (0.31–2.65) 1a<br>2.20 (1.17–4.12) 2a<br>4.52 (2.69–7.60) 3a<br><i>Pooled CSA</i><br>2.87 (1.97–4.18) a    | OR  |
| Cutajar (175)              | 1 Confirmed CSA < 16 y by records of the                                                              | a Lifetime PTSD<br>b Lifetime Anxiety disorder                      | Diagnoses from the Victorian                           | 5365 part of (173)       | 33.8 $\pm$ 11.0         | Victoria, Australia 12-43 year              | 5.56 (3.44–8.99) 1a<br>2.67 (1.97–3.61) 1b                                                                      | OR  |

|           |                                                                                                            |               |                           |      |       |                                               |                   |     |
|-----------|------------------------------------------------------------------------------------------------------------|---------------|---------------------------|------|-------|-----------------------------------------------|-------------------|-----|
|           | Victorian Institute of Forensic Medicine                                                                   |               | Psychiatric Case Registry |      |       | follow-up                                     |                   |     |
| Scott (2) | Primary client in CPS database plus retrospective assessment of sexual abuse, physical abuse or WDV < 17 y | Lifetime PTSD | Interview (CIDI)          | 2144 | 16-27 | New Zealand National Survey 10 year follow-up | 4.86 (2.26-10.45) | aOR |

\*The number indicates which type of maltreatment and the letter indicates which clinical outcome the odds ratio applies to within a given study with multiple types of maltreatment or outcomes (e.g., Fergusson (179) 1a, 1 = Non-contact sexual activity, a = any anxiety disorder).

Abbreviations: aOR – odds ratio adjusted for covariates, APMS - Adult Psychiatric Morbidity Survey CIDI - World Health Organization Composite International Diagnostic Interview, CIS-R - Clinical Interview Schedule – Revised, CPA - Childhood Physical Abuse, CPS – Child Protective Service or similar agency, CSA - Childhood Sexual Abuse, DIS - Diagnostic Interview Schedule, CWHS –California Women’s Health Survey, DISC - Diagnostic Interview Schedule for Children, DSM - Diagnostic and Statistical Manual of Mental Disorders, F - Female, GAD – Generalized anxiety disorder, HADS – Hospital Anxiety and Depression Scale, M - Male, mo - month, NCS-R – National Comorbidity Survey – Replication, NLAAS - National Latino and Asian American Survey, NSA-R - National Survey of Adolescents–Replication, NCS-R – National Comorbidity Survey – Replication, NWS - National Women’s Study, NWS–R - National Women’s Study–Replication, OR – raw odds ratio, SCID - Structured Clinical Interview for DSM Disorders, SQ – Symptom Questionnaire, SR - Self-Report, SSAGA - Semi-Structured Assessment for the Genetics of Alcoholism, UUA - Unspecified Upper Age, w – with, wo - without, y – year.

Table S3. Odds of developing substance abuse disorders or problems in individuals exposed to childhood sexual abuse or multiple forms of maltreatment including sexual abuse.

| First Author (Reference)       | Types of Maltreatment                                                                                                                                   | Clinical Outcome                                                                                                                                   | Method                                                       | N                         | Age Range              | Restrictions Location                                     | Odds Ratio (95% CI)*                                                                                                                                                                   | Model |
|--------------------------------|---------------------------------------------------------------------------------------------------------------------------------------------------------|----------------------------------------------------------------------------------------------------------------------------------------------------|--------------------------------------------------------------|---------------------------|------------------------|-----------------------------------------------------------|----------------------------------------------------------------------------------------------------------------------------------------------------------------------------------------|-------|
| <b>Cross-sectional Studies</b> |                                                                                                                                                         |                                                                                                                                                    |                                                              |                           |                        |                                                           |                                                                                                                                                                                        |       |
| Nagy (220)                     | Forced intercourse w identified perpetrators v sexually experienced controls < 18 y                                                                     | Lifetime drug use                                                                                                                                  | SR (In school survey)                                        | 3124                      | 13-18                  | Females Urban, semiurban and rural Southern US            | 1.50 (1.04-2.50)                                                                                                                                                                       | OR    |
| Fergusson (179)                | 1 Non-contact sexual activity<br>2 Contact w/o penetration<br>3 Penetration or attempt<br>All < 16 years of age                                         | a Alcohol abuse-dependence<br>b Drug abuse-dependence<br>Between ages 16-18                                                                        | Interview (CID)                                              | 1019                      | 18                     | Christchurch, NZ Longitudinal evaluation                  | 1.9 (0.7-5.0) 1a<br>3.2 (1.6-6.5) 2a<br>2.7 (1.2-6.0) 3a<br>0.7 (0.1-5.8) 1b<br>1.8 (0.7-4.8) 2b<br>6.6 (2.9-15.2) 3b<br><i>Pooled CSA</i><br>3.66 (2.31-5.81) a<br>3.28 (1.80-5.97) b | aOR   |
| Wilsnack (180)                 | 1 Unwanted familial sexual activity < 18 y or w ≥ 5 y older individual or unwanted extra-familial sexual activity < 18 y or < 13 y w ≥ 5 y older person | a Heavy episodic drinking past y<br>b Intoxication<br>c Alcohol dependence symptoms<br>d Problem Drinking Index ≥ 2<br>e Lifetime illicit drug use | Interview surveys including Composite Problem Drinking Index | 1099                      | 21-UUA                 | Females US National                                       | 1.58 (0.94-2.65) 1a<br>1.65 (1.04-2.62) 1b<br>3.04 (1.71-5.39) 1c<br>2.52 (1.49-4.27) 1d<br>2.52 (1.58-4.03) 1e                                                                        | aOR   |
| Harrison (221)                 | Forced or unwanted touch / touching by extrafamilial adult or older person or older stronger family member ± physical abuse                             | Lifetime substance use v never used                                                                                                                | SR (In school survey)                                        | 122824                    | 10-19 Grades 6, 9 & 12 | Minnesota public school students                          | 2.86 (2.73-3.00)<br><br><i>Pooled across grades and genders</i>                                                                                                                        | OR    |
| McCauley (181)                 | 1 Ever sexually abused and/or physically abuse < 18 but not after 18                                                                                    | a Current street drug use<br>b Lifetime street drug use<br>c Current alcohol abuse<br>d Lifetime drinking problems                                 | SCL-22                                                       | 1931                      | 18-UUA                 | Females Baltimore primary care sample                     | 12.15 (3.0-49.0) 1a<br>3.52 (2.37-5.22) 1b<br>1.27 (0.65-2.47) 1c<br>2.65 (1.58-4.46) 1d                                                                                               | OR    |
| Garnefski (222)                | Sexually abused (e.g., forced to perform sexual acts, assaulted or raped)                                                                               | Addiction-risk behaviors (past month alcohol or past year drugs)                                                                                   | SR                                                           | 1490 (50% history of CSA) | 12-19                  | Netherlands subsample of representative 2nd school sample | 2.61 (2.06-3.32)                                                                                                                                                                       | OR    |
| Jantzen (223)                  | Forced sexual activity < 18 y ± physical abuse                                                                                                          | Lifetime cocaine use                                                                                                                               | SR use semi-structured abuse interview                       | 1059                      | 18-UUA                 | Pregnant New Haven CT obstetric sample                    | 3.48 (2.49-4.87)                                                                                                                                                                       | OR    |

|                 |                                                                                           |                                                                               |                             |                         |        |                                            |                                                                                                                                                                                                             |     |
|-----------------|-------------------------------------------------------------------------------------------|-------------------------------------------------------------------------------|-----------------------------|-------------------------|--------|--------------------------------------------|-------------------------------------------------------------------------------------------------------------------------------------------------------------------------------------------------------------|-----|
| Bensley (224)   | Unwanted touch or touching < 18 years ± physical abuse                                    | Heavy drinking (5 or more drinks per occasion ≥ 4 times in past mo)           | Telephone Interview         | 3473                    | 18-UUA | Washington state population sample (BRFSS) | 2.18 (1.32–3.61)<br><i>Pooled M &amp; F</i>                                                                                                                                                                 | aOR |
| Dinwiddie (182) | Forced into sexual activity, including intercourse < 18 y                                 | Alcoholism                                                                    | Telephone Interview (SSAGA) | 3868                    | 27-90  | Female twins Australia National            | 1.78 (1.31-2.42)                                                                                                                                                                                            | OR  |
| Kendler (8)     | 1 Non-genital<br>2 Genital touch or view<br>3 Intercourse or attempt<br>All < 16 years    | a Lifetime alcohol dependence<br>b Lifetime drug dependence                   | Interview (SCID DSMIIIIR)   | 1411                    | 17-55  | Female twins Virginia population           | 1.89 (0.79-4.55) 1a<br>2.55 (1.39–4.69) 2a<br>4.75 (2.34–9.62) 3a<br>2.37 (0.93–6.03) 1b<br>1.23 (0.58–2.60) 2b<br>5.68 (2.55–12.6) 3b<br><i>Pooled any CSA</i><br>2.90 (1.79–4.69) a<br>2.50 (1.39–4.50) b | aOR |
| Molnar (183)    | 1 Raped or molested < 18 years                                                            | a Lifetime alcohol dependence<br>b Lifetime drug dependence                   | Interview (CID1)            | 5866                    | 15-54  | US National Comorbidity Study              | 1.57 (1.14–2.15) 1a<br>2.00 (1.38–2.90) 1b<br><i>Pooled M and F</i>                                                                                                                                         | aOR |
| MacMillan (34)  | 1 Unwanted exposure, threats, touching attempted sex or attack w adult while “growing up” | a Lifetime alcohol abuse or dependence<br>b Lifetime drug abuse or dependence | Interview (CID1)            | 7016                    | 15-64  | Ontario Canada probability sample (OHS)    | 2.5 (1.7–3.7) 1a<br>3.8 (2.2–6.7) 1b                                                                                                                                                                        | aOR |
| Thompson (225)  | 1 Penetration force or attempt < 18 y controlling for physical abuse                      | a Drug use past month<br>b Daily alcohol use past year                        | Telephone interview         | 8000                    | 18-UUA | Females US National (NVAWS)                | 1.55 (1.29–1.87) 1a<br>0.95 (0.59–1.54) 1b                                                                                                                                                                  | aOR |
| Anda (1)        | Touch, attempt or penetration < 18 y with person ≥ 5 yrs older from ACE                   | Lifetime or current alcoholism                                                | SR (Postal survey)          | 9346                    | 19-94  | San Diego HMO sample                       | 1.9 (1.6–2.4)                                                                                                                                                                                               | aOR |
| Dube (226)      | 1 Touch attempt or penetration < 18 with person ≥ 5 yrs older from ACE scale              | a Heavy drinking<br>b Alcohol problem<br>c Self-reported alcoholic            | SR (Postal survey)          | 17337 overlaps with (1) | 19-94  | San Diego HMO sample                       | 1.29 (1.17–1.43) 1a<br>1.94 (1.73–2.16) 1b<br>1.80 (1.58–2.06) 1c                                                                                                                                           | OR  |
| Turner (227)    | 1 rape or attempt, sexual assault or fear of, forced unwanted sex, unwanted advances      | a Cannabis use only<br>b Multidrug use                                        | SR (Postal survey)          | 9512                    | 22-27  | Females Australia National (ALSWH)         | 1.2 (1.0–1.4) 1a<br>1.7 (1.4–2.0) 1b                                                                                                                                                                        | aOR |
| Dube (9)        | 1 Touch attempt or penetration < 18 with person ≥ 5 yrs older from ACE scale              | a Drug use ≤ 14 years<br>b Lifetime drug use                                  | SR (Postal survey)          | 8613 overlaps with (1)  | 19-94  | San Diego HMO sample                       | 2.8 (2.1–3.7) 1a<br>2.0 (1.8–2.3) 1b                                                                                                                                                                        | aOR |
| Coid (215)      | Unwanted sex ± intercourse < 16 y controlling for other abuse and sexual assault >        | Alcohol misuse                                                                | SR Survey (CAGE ≥ 2)        | 718                     | 16-85  | Females community medical sample UK        | 1.11 (0.63–1.97)                                                                                                                                                                                            | aOR |

|                  |                                                                                                                                           |                                                                                                                                  |                       |       |           |                                          |                                                                                                                                                                                              |     |
|------------------|-------------------------------------------------------------------------------------------------------------------------------------------|----------------------------------------------------------------------------------------------------------------------------------|-----------------------|-------|-----------|------------------------------------------|----------------------------------------------------------------------------------------------------------------------------------------------------------------------------------------------|-----|
|                  | 16 years                                                                                                                                  |                                                                                                                                  |                       |       |           |                                          |                                                                                                                                                                                              |     |
| Nichols (228)    | CSA assault, frequent exposure or fear ± physical abuse < 12 years                                                                        | Smoking (> 100 cigarettes lifetime)                                                                                              | SR (Postal survey)    | 722   | 36-45     | Females Massachusetts population sample  | 2.55 (1.46–4.48)                                                                                                                                                                             | aOR |
| Bergen (229)     | 1 'Have you ever been sexually abused'? Single item                                                                                       | a Frequent alcohol use (≥ weekly)<br>b Frequent marijuana use<br>c Ever use inhalants, hallucinogens, stimulants, injected drugs | SR (In school survey) | 2596  | 13-15     | South Australia community sample         | 3.63 (2.75–4.78) 1a<br>4.61 (3.45–6.16) 1b<br>11.7 (8.91–15.4) 1c<br><br><i>Pooled M &amp; F and across 3 time points</i>                                                                    | OR  |
| Libby (230)      | 1 CSA rape, unwanted sex, forced touch < 13 years                                                                                         | a Lifetime alcohol dependence<br>b Lifetime drug dependence                                                                      | Interview (CIDI)      | 3056  | 15-54     | American Indians, 2 tribes               | 2.30 (1.08-4.89) 1a<br>4.18 (1.20-14.6) 1b<br><i>Pooled across tribes</i>                                                                                                                    | aOR |
| Bebbington (231) | 1 Uncomfortable talk, non-consensual touch, touching, intercourse (232)                                                                   | a Alcohol dependence past 6 month<br>b Drug dependence past week                                                                 | SR (SADQ)             | 8580  | 16–74     | England National (APMS)                  | 2.36 (1.5-3.6) 1a<br>1.84 (1.1-3.2) 1c                                                                                                                                                       | OR  |
| Kaukinen (233)   | 1 CSA forced threatened intercourse, penetration or attempt < 14 or 14-19 y                                                               | a Current heavy episodic drinking<br>b Current illicit drug use                                                                  | Interview             | 7689  | 18-UUA    | Females US National (NVAWS)              | 1.29 (0.96–1.73) 1a<br>2.55 (1.80–3.63) 1b<br><i>Pooled across child and adolescent CSA</i>                                                                                                  | aOR |
| Young (234)      | Touch attempt or penetration < 18 y with person ≥ 5 years older from ACE scale                                                            | Risky drinking past year                                                                                                         | RAP survey            | 41482 | 18–20     | US Marine Corps Recruits                 | 1.55 (1.31–1.84)                                                                                                                                                                             | OR  |
| Hussey (188)     | 1 Touched forced to touch or forced sex by parents or other adult-care givers < 6 <sup>th</sup> grade                                     | a Binge Drinking<br>b Marijuana past month<br>c Lifetime use of Inhalants                                                        | SR                    | 10828 | 18-26     | US National (Add Health)                 | 1.6 p<0.05 1a<br>2.0 p<0.05 1b<br>1.7 p<0.05 1c                                                                                                                                              | aOR |
| Nelson (235)     | 1 Forced sexual activity or intercourse < 18 y or sexual contact < 16 y w ≥ 5 y older extra-familial or adult familial or raped /molested | a Cannabis<br>b Alcohol<br>c Opioids<br>d Sedatives<br>e Stimulants<br>f Cocaine<br>Lifetime abuse or dependence                 | Interview (SSAGA)     | 6050  | 25-36     | Australia National Twins                 | 2.52 (1.97–3.21) 1a<br>2.19 (1.95–2.46) 1b<br>7.11 (3.68–13.8) 1c<br>9.80 (4.30–22.3) 1d<br>2.83 (1.85–4.34) 1e<br>2.03 (0.43–9.63) 1f<br><i>Pooled across all drugs</i><br>3.04 (2.50–3.69) | aOR |
| Trent (236)      | 1 Familial touch or penetration or w someone older before 18 years                                                                        | a Ever drank<br>b Current drinker<br>c Binge drinking<br>d Alcohol arrest<br>e Alcoholic MAST<br>f Alcohol abuser                | SR (CSEC, MAST)       | 5697  | Mean 19.9 | US Navy recruits (53% male)              | 2.07 (1.73–2.48) 1a<br>1.28 (1.10–1.49) 1b<br>1.54 (1.35–1.77) 1c<br>1.57 (1.25–1.98) 1d<br>1.80 (1.56–2.08) 1e<br>1.57 (1.35–1.83) 1f                                                       | aOR |
| Al Mamun (237)   | 1 Non-penetration (exposure, touch, touching)<br>2 Penetration (oral sex intercourse) < 16 y                                              | a Lifetime nicotine dependence                                                                                                   | SR (CIDI-Auto)        | 2150  | 21        | South Brisbane Australia Hospital sample | 2.08 (1.54-2.80) 1a<br>2.88 (1.99-4.16) 2a<br><i>Pooled across criteria</i><br>2.37 (1.88–2.99) a                                                                                            | aOR |

|                   |                                                                                           |                                                                                                           |                            |                        |        |                                          |                                                                                              |     |
|-------------------|-------------------------------------------------------------------------------------------|-----------------------------------------------------------------------------------------------------------|----------------------------|------------------------|--------|------------------------------------------|----------------------------------------------------------------------------------------------|-----|
| Timko (238)       | Forced into unwanted sexual activity < 18 y                                               | Binge drinking ( $\geq$ 5 drinks occasion) past month                                                     | Telephone Interview        | 6942                   | 18-UUA | Females California (CWHS)                | 1.53 (1.21–1.92)                                                                             | aOR |
| Roberts (239)     | 1 Forced sex w adult care-taker < 6 <sup>th</sup> grade                                   | a Regular smoking past year<br>b Lifetime ever regular smoking                                            | Home Interview             | 15197 overlaps w (188) | 18-26  | US National (Add Health) Wave 3)         | 1.06 (0.68–1.66) 1a<br>1.43 (1.07–1.92) 1b                                                   | aOR |
| Hamburger (240)   | 1 Forced or unwanted sexual activity < 10 years                                           | a Ever drink<br>b Early alcohol use (< 13 years)<br>c Heavy episodic drinking past year                   | SR (Youth Violence Survey) | 3559                   | 15-19  | Hi Risk US school district in small city | 1.87 (1.39-2.52) 1a<br>1.57 (1.16-2.14) 1b<br>1.70 (1.26-2.30) 1c                            | aOR |
| Duncan (241)      | Raped, molested or forced sex < 16 years                                                  | Lifetime cannabis abuse or dependence                                                                     | Interview (SSAGA)          | 819                    | 15-29  | US off-spring of twins (VETR)            | 2.81 (1.69–4.65)                                                                             | OR  |
| Afifi (190)       | Intercourse or penetration w force or threat or unwanted touch < 16 y                     | Any substance abuse disorder lifetime                                                                     | Interview (CIDI)           | 5142 F<br>4149 M       | 18-UUA | US National (NCS-R)                      | 1.48 (1.07-2.03) F<br>1.45 (NS) M                                                            | aOR |
| Zlotnick (191)    | 1 Potentially traumatic childhood event including rape < 15 y v none                      | a Lifetime drug / alcohol disorder<br>b Lifetime nicotine dependence                                      | Interview (DIS) (CIDI)     | 2390                   | 15-UUA | Chile National                           | 3.0 (1.8-5.0) 1a<br>1.3 (0.5-3.2) 1b                                                         | aOR |
| Draper (194)      | 1 Victim of any sexual abuse $\pm$ physical abuse < 15                                    | a Ever smoker<br>b Current smoker<br>c Harmful alcohol use > 4 drinks/day                                 | Postal survey              | 21822                  | 60-UUA | Australia, general medical practice      | 1.36 (1.23–1.51) 1a<br>1.95 (1.62–2.34) 1b<br>1.14 (0.91–1.42) 1c                            | aOR |
| Pederson (242)    | 1 Childhood sexual abuse (undefined)                                                      | a Nicotine Use<br>b Marijuana Use<br>c Cocaine Use<br><i>All Lifetime</i>                                 | SR (Tel Quest)             | 811                    | 18-59  | Females Ohio convenience sample          | 1.91 (1.38-2.66) 1a<br>2.20 (1.53-3.17) 1b<br>1.63 (1.04-2.53) 1c                            | OR  |
| Jun (243)         | CSA forced touch or activity < 17                                                         | Smoking by age 14                                                                                         | Mailed survey              | 68107                  | 37-54  | Females US National (NHS)                | 1.6 (1.4–1.8)                                                                                | aOR |
| Chartier (244)    | 1 Unwanted exposure, threats, touching attempted sex or attack w adult while “growing up” | a Current smoking<br>b Alcohol abuse or dependence                                                        | SR (CIDI)                  | 8116 overlaps w (34)   | 15-64  | Ontario CA population sample (OHS)       | 1.52 (1.16–1.99) 1a<br>2.44 (1.74–3.44) 1b                                                   | aOR |
| Hayatbakhsh (245) | 1 Pressured or forced to have unwanted sexual contact < 16                                | a Amphetamine use (ever)<br>b Lifetime amphetamine use disorder                                           | SR (CIDI-Auto)             | 2042 overlaps w (237)  | 21     | South Brisbane Australia Hospital sample | 1.82 (1.30–2.55) 1a<br>1.75 (1.18–2.58) 1b<br><i>Pooled ‘once-twice and 3 or more times’</i> | aOR |
| Ramiro (201)      | 1 Touch attempt or penetration < 18 with person $\geq$ 5 yrs older from ACE scale         | a Current smoker<br>b Early smoking<br>c Driving drunk<br>d Illicit drug use<br><i>Lifetime c &amp; d</i> | SR (ACE survey)            | 1068                   | 35-92  | Metro Manila, Philippines                | 1.9 (1.0–3.4) 1a<br>2.1 (1.0–4.7) 1b<br>1.7 (0.6–4.8) 1c<br>2.9 (1.4–5.9) 1d                 | aOR |
| Hughes (246)      | 1 Sexually assaulted, molested, raped or experienced unwanted sexual                      | a Alcohol abuse<br>b Drug abuse<br><i>All past year</i>                                                   | Interview (AUDADIS-IV)     | 33487                  | 20-UUA | US National (NESARC)                     | 1.06 (0.81–1.38) 1a<br>1.73 (1.12–2.68) 1b<br><i>Pooled M &amp; F</i>                        | aOR |



|                            |                                                                                                                                                   |                                                                                |                                         |                            |        |                                                         |                                                                                                                                                                                       |     |
|----------------------------|---------------------------------------------------------------------------------------------------------------------------------------------------|--------------------------------------------------------------------------------|-----------------------------------------|----------------------------|--------|---------------------------------------------------------|---------------------------------------------------------------------------------------------------------------------------------------------------------------------------------------|-----|
|                            | activity < 18 y                                                                                                                                   |                                                                                |                                         |                            |        |                                                         |                                                                                                                                                                                       |     |
| Derringer (247)            | 1 Sexual contact < 13 w anyone ≥ 5 y older or unwanted forced or threatened sexual contact < 16 years                                             | a Alcohol abuse<br>b Tobacco abuse<br>c Cannabis abuse<br>All lifetime history | Interview (CIDI substance abuse module) | 841                        | 25     | Same sex twins<br>Minnesota                             | 0.98 (0.71-1.35) 1a<br>1.27 (0.87-1.85) 1b<br>1.15 (0.76-1.74) 1c                                                                                                                     | aOR |
| King (202)                 | Exposure, touch ± force, penetration or intercourse < 18 years                                                                                    | Any substance use disorder past 6 months                                       | Interview (DISC)                        | 1735                       | 10-18  | Cook County IL.<br>Juvenile Detention Center stratified | 2.64 (1.68-4.14)<br><i>Pooled sexual abuse ± severe physical abuse</i>                                                                                                                | OR  |
| Chu (248)                  | 1 Sexual act perpetrated by adult or coercive sexual act by a peer < 14 years<br>2 unwanted contact, verbal coercion, rape or attempt high school | a Marijuana use in high school<br>b Marijuana use in college (yr 2)            | Interviews                              | 1569                       | 18-22  | Females South-eastern US university sample              | 1.68 (1.12-2.52) 1a<br>2.03 (1.37-3.02) 2a<br>1.09 (0.74-1.61) 1b<br>1.13 (0.78-1.64) 2b<br><br><i>Pooled &lt; 14 and high school CSA</i><br>1.85 (1.39-2.46) a<br>1.11 (0.85-1.45) b | aOR |
| Vander Weg (249)           | 1 Touched<br>2 Forced to touch<br>3 Forced sex < 18 y from ACE scale                                                                              | a Lifetime smoking<br>b Current smoking                                        | Telephone survey                        | 10277                      | 18-UUA | Arkansas Louisiana representative sample (BRFSS)        | 2.23 (1.96-2.52) a<br>2.02 (1.71-2.38) b<br><br><i>Pooled across CSA exposure levels</i>                                                                                              | aOR |
| Huang (73)                 | 1 CSA touch or forced sex < 6 <sup>th</sup> grade                                                                                                 | a Use drugs past year<br>b Use drugs past 30 days<br>c Drug use problems       | SR (In-Home Survey.)                    | 4882 overlaps w (188, 239) | 18-26  | US National (Add Health)                                | 1.01 (0.67-1.50) 1a<br>1.24 (0.81-1.90) 1b<br>1.78 (1.09-2.90) 1c                                                                                                                     | OR  |
| Jonas (203)                | 1 Non-consensual touch<br>2 Non-consensual intercourse < 16 years                                                                                 | a Alcohol dependence past 6 months<br>b Drug dependence past year              | SR (AUDIT & SADQ-C)                     | 7403                       | 16-UUA | England National (APMS)                                 | 1.41 (0.94-2.1) 1a<br>3.71 (2.2-6.4) 2a<br>1.26 (0.7-2.3) 1b<br>5.49 (3.0-10.) 2b<br><i>Pooled exposure</i><br>2.00 (1.45-2.76) a<br>2.61 (1.71-3.98) b                               | OR  |
| Chou (206)                 | 1 Non-consensual touch or intercourse < 16 years                                                                                                  | a Alcohol dependence<br>b Drug dependence. All past 6 months                   | Computer-assisted self interview        | 3493 overlaps with (203)   | 50-UUA | Middle-age or older England National (APMS)             | 1.50 (0.69-3.29) 1a<br>1.39 (0.38-5.10) 1b                                                                                                                                            | OR  |
| Fuller-Thomson (250)       | Forced sex < 18 y by someone ≥ 5 years older from ACE scale                                                                                       | Lifetime smoking history                                                       | Telephone survey                        | 19356                      | 18-99  | US 5 States (BRFSS)                                     | 1.54 (1.32-1.79)                                                                                                                                                                      | aOR |
| <b>Prospective Studies</b> |                                                                                                                                                   |                                                                                |                                         |                            |        |                                                         |                                                                                                                                                                                       |     |
| Widom (174)                | Court substantiated abuse or neglect < 12 y                                                                                                       | Current Alcoholism                                                             | SR (DIS)                                | 1066                       | 18-40  | US, metropolitan Midwest, 22 yr follow-up               | 0.93 (0.69-1.25)                                                                                                                                                                      | OR  |
| Thornberry (213)           | 1 Substantiated maltreatment CPS (including                                                                                                       | a Drug use<br>b Alcohol-related problems                                       | Interviews SR drug and                  | 881 Early Adol             | ~13    | Rochester NY stratified high-                           | 2.12 (1.47-3.08) 1a<br>Early adolescence<br>1.44 (0.99-2.10) 1a                                                                                                                       | aOR |

|                 |                                                                                                                      |                                                                                |                                                        |                          |                |                                                         |                                                                                                                                                                                |     |
|-----------------|----------------------------------------------------------------------------------------------------------------------|--------------------------------------------------------------------------------|--------------------------------------------------------|--------------------------|----------------|---------------------------------------------------------|--------------------------------------------------------------------------------------------------------------------------------------------------------------------------------|-----|
|                 | physical and sexual abuse; neglect; lack of supervision; moral, legal, and educational neglect; and emotional abuse) | during early or late adolescence                                               | alcohol problems                                       | 818<br>Late Adol         | 18             | risk study<br>Early Adol<br>Late Adol<br>3 yr follow-up | Late adolescence<br>2.02 (1.27–3.26) 1b<br>Early adolescence<br>1.46 (0.90–2.29) 1b<br>Late adolescence<br><i>Pooled outcome</i><br>1.75 (1.35–2.28) 1a<br>1.71 (1.23–2.39) 1b |     |
| Smith (251)     | CSA from CPS 12-17 y subjects w early abuse only excluded                                                            | Drug use in late adolescents or early adulthood                                | SR (Survey)                                            | 884                      | 16-18<br>20-22 | Rochester NY, 9 year follow-up                          | 1.99 (0.91–4.36)                                                                                                                                                               | aOR |
| Widom (252)     | Court substantiated abuse or neglect < 12 years                                                                      | a Marijuana<br>b Cocaine<br>c Heroin<br>d Psychedelics<br><i>Past year use</i> | Interview (structured module for illicit drug use)     | 892 overlaps with (174)  | 30-47          | US, metropolitan Midwest, ~ 30 yr follow-up             | 1.49 (1.10–2.02) 1a<br>1.21 (0.76–1.92) 1b<br>1.60 (0.14–17.7) 1c<br>2.42 (0.49–12.1) 1d<br><i>Pooled drug use</i><br>1.42 (1.11–1.82)                                         | OR  |
| Lo (74)         | 1 Reported being victim of sexual attack during Waves 1-5.                                                           | a Current alcohol abuse<br>b Current drug abuse                                | Interview                                              | 765                      | 21-24          | US National (NYS) Waves 1-5 & 7. 11 y follow-up         | 0.99 NS<br>1.93 NS                                                                                                                                                             | aOR |
| Fergusson (214) | 1 Non-contact sexual activity<br>2 Contact wo penetration<br>3 Penetration or attempt All < 16 years                 | a Substance dependence between 21-25 years                                     | Interview (CID)                                        | 1001 overlaps with (179) | 21-25          | Christchurch, NZ 3 year follow-up                       | 0.95 (0.28–3.20) 1a<br>0.66 (0.23–1.87) 2a<br>1.94 (1.02–3.69) 3a<br><i>Pooled CSA</i><br>1.35 (0.82–2.22) a                                                                   | OR  |
| Cutajar (175)   | 1 Confirmed CSA < 16 y by records of the Victorian Inst of Forensic Medicine                                         | a Lifetime alcohol abuse<br>b Lifetime drug abuse                              | Diagnoses from the Victorian Psychiatric Case Registry | 5365                     | 33.82 ± 11.03  | Victoria, Australia 12-43 year follow-up                | 5.88 (3.26–10.6) 1a<br>5.94 (3.68–9.58) 1b                                                                                                                                     | OR  |

\*The number indicates which type of maltreatment and the letter indicates which clinical outcome the odds ratio applies to within a given study with multiple types of maltreatment or outcomes (e.g., Fergusson (179) 1a, 1 = Non-contact sexual activity, a = alcohol abuse or dependence).

ACE – Adverse Childhood Experience survey, Adol – adolescence, ALSWH - Australian Longitudinal Study on Women’s Health, aOR – adjusted odds ratio, APMS – Adult Psychiatric Morbidity Survey, AUDADIS-IV - Alcohol Use Disorders and Associated Disabilities Interview Schedule DSM-IV, AUDIT - Alcohol Use Disorders Identification Test, BRFSS - Behavioral Risk Factor Surveillance System, CIDI - World Health Organization Composite International Diagnostic Interview, CSA – childhood sexual abuse, CSEC - Childhood Sexual Experiences Checklist, CWSH - California Women's Health Survey, DIS - Diagnostic Interview Schedule, DISC – Diagnostic Interview Schedule for Children, MAST – Michigan Alcoholism Screening Test, NCS-R – National Comorbidity Survey – Replication, NESARC – National Epidemiologic Survey on Alcohol and Related Conditions, NLSAH - National Longitudinal Study of Adolescent Health, NHS - Nurses Health Survey, NVAWS - Violence and Threats of Violence against Women and Men in the United States Survey, OHS – Ontario Health Survey, OR - raw odds ratio, RAP - Recruit Assessment Program, SADQ - Severity of Alcohol Dependence Questionnaire, SR – self report, SSAGA - Semi-Structured Assessment for the Genetics of Alcoholism, US – United States of America, UUA – unspecified upper age, VETR – Vietnam Era Twin Registry, w – with, wo – without, y - years

## References

144. De Bellis MD, Keshavan MS. Sex differences in brain maturation in maltreatment-related pediatric posttraumatic stress disorder. *Neurosci Biobehav Rev.* 2003;27(1-2):103-17.
145. Zanetti MV, Soloff PH, Nicoletti MA, Hatch JP, Brambilla P, Keshavan MS, et al. MRI study of corpus callosum in patients with borderline personality disorder: a pilot study. *Progress in neuro-psychopharmacology & biological psychiatry.* 2007;31(7):1519-25.
146. Rusch N, Luders E, Lieb K, Zahn R, Ebert D, Thompson PM, et al. Corpus callosum abnormalities in women with borderline personality disorder and comorbid attention-deficit hyperactivity disorder. *J Psychiatry Neurosci.* 2007;32(6):417-22.
147. Kitayama N, Brummer M, Hertz L, Quinn S, Kim Y, Bremner JD. Morphologic alterations in the corpus callosum in abuse-related posttraumatic stress disorder: a preliminary study. *The Journal of nervous and mental disease.* 2007;195(12):1027-9.
148. Carrion VG, Weems CF, Watson C, Eliez S, Menon V, Reiss AL. Converging evidence for abnormalities of the prefrontal cortex and evaluation of midsagittal structures in pediatric posttraumatic stress disorder: an MRI study. *Psychiatry research.* 2009;172(3):226-34.
149. Frodl T, Carballo A, Fagan AJ, Liseicka D, Ferguson Y, Meaney JF. Effects of early-life adversity on white matter diffusivity changes in patients at risk for major depression. *J Psychiatry Neurosci.* 2012;37(1):37-45.
150. Pederson CL, Maurer SH, Kaminski PL, Zander KA, Peters CM, Stokes-Crowe LA, et al. Hippocampal volume and memory performance in a community-based sample of women with posttraumatic stress disorder secondary to child abuse. *J Trauma Stress.* 2004;17(1):37-40.
151. Zetsche T, Preuss UW, Frodl T, Schmitt G, Seifert D, Munchhausen E, et al. Hippocampal volume reduction and history of aggressive behaviour in patients with borderline personality disorder. *Psychiatry research.* 2007;154(2):157-70.
152. Bonne O, Vythilingam M, Inagaki M, Wood S, Neumeister A, Nugent AC, et al. Reduced posterior hippocampal volume in posttraumatic stress disorder. *J Clin Psychiatry.* 2008;69(7):1087-91.
153. Weniger G, Lange C, Sachsse U, Irle E. Amygdala and hippocampal volumes and cognition in adult survivors of childhood abuse with dissociative disorders. *Acta Psychiatr Scand.* 2008;118(4):281-90.
154. Lenze SN, Xiong C, Sheline YI. Childhood adversity predicts earlier onset of major depression but not reduced hippocampal volume. *Psychiatry research.* 2008;162(1):39-49.
155. Soloff P, Nutche J, Goradia D, Diwadkar V. Structural brain abnormalities in borderline personality disorder: a voxel-based morphometry study. *Psychiatry research.* 2008;164(3):223-36.
156. Gatt JM, Nemeroff CB, Dobson-Stone C, Paul RH, Bryant RA, Schofield PR, et al. Interactions between BDNF Val66Met polymorphism and early life stress predict brain and arousal pathways to syndromal depression and anxiety. *Mol Psychiatry.* 2009;14(7):681-95.
157. Thomaes K, Dorrepaal E, Draijer N, de Rooter MB, van Balkom AJ, Smit JH, et al. Reduced anterior cingulate and orbitofrontal volumes in child abuse-related complex PTSD. *J Clin Psychiatry.* 2010;71(12):1636-44.
158. Landre L, Destrieux C, Baudry M, Barantin L, Cottier JP, Martineau J, et al. Preserved subcortical volumes and cortical thickness in women with sexual abuse-related PTSD. *Psychiatry research.* 2010;183(3):181-6.

159. Sala M, Caverzasi E, Lazzaretti M, Morandotti N, De Vidovich G, Marraffini E, et al. Dorsolateral prefrontal cortex and hippocampus sustain impulsivity and aggressiveness in borderline personality disorder. *Journal of affective disorders*. 2011;131(1-3):417-21.
160. Everaerd D, Gerritsen L, Rijpkema M, Frodl T, van Oostrom I, Franke B, et al. Sex modulates the interactive effect of the serotonin transporter gene polymorphism and childhood adversity on hippocampal volume. *Neuropsychopharmacology*. 2012;37(8):1848-55.
161. Carballedo A, Lisiecka D, Fagan A, Saleh K, Ferguson Y, Connolly G, et al. Early life adversity is associated with brain changes in subjects at family risk for depression. *World J Biol Psychiatry*. 2012;13(8):569-78.
162. De Bellis MD, Hall J, Boring AM, Frustaci K, Moritz G. A pilot longitudinal study of hippocampal volumes in pediatric maltreatment-related posttraumatic stress disorder. *Biological psychiatry*. 2001;50(4):305-9.
163. Chugani HT, Behen ME, Muzik O, Juhasz C, Nagy F, Chugani DC. Local brain functional activity following early deprivation: a study of postinstitutionalized Romanian orphans. *NeuroImage*. 2001;14(6):1290-301.
164. Carrion VG, Haas BW, Garrett A, Song S, Reiss AL. Reduced hippocampal activity in youth with posttraumatic stress symptoms: an fMRI study. *J Pediatr Psychol*. 2010;35(5):559-69.
165. Maheu FS, Dozier M, Guyer AE, Mandell D, Peloso E, Poeth K, et al. A preliminary study of medial temporal lobe function in youths with a history of caregiver deprivation and emotional neglect. *Cogn Affect Behav Neurosci*. 2010;10(1):34-49.
166. Edmiston EE, Wang F, Mazure CM, Guiney J, Sinha R, Mayes LC, et al. Corticostriatal-limbic gray matter morphology in adolescents with self-reported exposure to childhood maltreatment. *Arch Pediatr Adolesc Med*. 2011;165(12):1069-77.
167. De Bellis MD, Keshavan MS, Frustaci K, Shifflett H, Iyengar S, Beers SR, et al. Superior temporal gyrus volumes in maltreated children and adolescents with PTSD. *Biological psychiatry*. 2002;51(7):544-52.
168. Richert KA, Carrion VG, Karchemskiy A, Reiss AL. Regional differences of the prefrontal cortex in pediatric PTSD: an MRI study. *Depress Anxiety*. 2006;23(1):17-25.
169. Kitayama N, Quinn S, Bremner JD. Smaller volume of anterior cingulate cortex in abuse-related posttraumatic stress disorder. *Journal of affective disorders*. 2006;90(2-3):171-4.
170. Carrion VG, Weems CF, Richert K, Hoffman BC, Reiss AL. Decreased prefrontal cortical volume associated with increased bedtime cortisol in traumatized youth. *Biological psychiatry*. 2010;68(5):491-3.
171. van Harmelen AL, van Tol MJ, van der Wee NJ, Veltman DJ, Aleman A, Spinhoven P, et al. Reduced medial prefrontal cortex volume in adults reporting childhood emotional maltreatment. *Biological psychiatry*. 2010;68(9):832-8.
172. Gerritsen L, Tendolkar I, Franke B, Vasquez AA, Kooijman S, Buitelaar J, et al. BDNF Val66Met genotype modulates the effect of childhood adversity on subgenual anterior cingulate cortex volume in healthy subjects. *Mol Psychiatry*. 2012;17(6):597-603.
173. Spataro J, Mullen PE, Burgess PM, Wells DL, Moss SA. Impact of child sexual abuse on mental health: prospective study in males and females. *Br J Psychiatry*. 2004;184:416-21.
174. Widom CS, Ireland T, Glynn PJ. Alcohol abuse in abused and neglected children followed-up: are they at increased risk? *J Stud Alcohol*. 1995;56(2):207-17.
175. Cutajar MC, Mullen PE, Ogloff JR, Thomas SD, Wells DL, Spataro J. Psychopathology in a large cohort of sexually abused children followed up to 43 years. *Child abuse & neglect*. 2010;34(11):813-22.

176. Herman JL. Complex PTSD: A syndrome in survivors of prolonged and repeated trauma. *Journal of Traumatic Stress*. 1992;5(3):377-91.
177. Robins E, Guze SB. Establishment of diagnostic validity in psychiatric illness: its application to schizophrenia. *The American journal of psychiatry*. 1970;126(7):983-7.
178. Guidelines for making changes to DSM-V. Revised 10/21/09 [database on the Internet]. 2009. Available from: <http://www.dsm5.org/ProgressReports/Documents/Guidelines-for-Making-Changes-to-DSM-1.pdf>
179. Fergusson DM, Horwood LJ, Lynskey MT. Childhood sexual abuse and psychiatric disorder in young adulthood: II. Psychiatric outcomes of childhood sexual abuse. *Journal of the American Academy of Child and Adolescent Psychiatry*. 1996;35(10):1365-74.
180. Wilsnack SC, Vogeltanz ND, Klassen AD, Harris TR. Childhood sexual abuse and women's substance abuse: national survey findings. *J Stud Alcohol*. 1997;58(3):264-71.
181. McCauley J, Kern DE, Kolodner K, Dill L, Schroeder AF, DeChant HK, et al. Clinical characteristics of women with a history of childhood abuse: unhealed wounds. *JAMA*. 1997;277(17):1362-8.
182. Dinwiddie S, Heath AC, Dunne MP, Bucholz KK, Madden PA, Slutske WS, et al. Early sexual abuse and lifetime psychopathology: a co-twin-control study. *Psychological medicine*. 2000;30(1):41-52.
183. Molnar BE, Buka SL, Kessler RC. Child sexual abuse and subsequent psychopathology: results from the National Comorbidity Survey. *Am J Public Health*. 2001;91(5):753-60.
184. Hanson RF, Saunders B, Kilpatrick D, Resnick H, Crouch JA, Duncan R. Impact of childhood rape and aggravated assault on adult mental health. *Am J Orthopsychiatry*. 2001;71(1):108-19.
185. Chapman DP, Whitfield CL, Felitti VJ, Dube SR, Edwards VJ, Anda RF. Adverse childhood experiences and the risk of depressive disorders in adulthood. *Journal of affective disorders*. 2004;82(2):217-25.
186. Tanskanen A, Hintikka J, Honkalampi K, Haatainen K, Koivumaa-Honkanen H, Viinamaki H. Impact of multiple traumatic experiences on the persistence of depressive symptoms--a population-based study. *Nord J Psychiatry*. 2004;58(6):459-64.
187. Libby AM, Orton HD, Novins DK, Beals J, Manson SM. Childhood physical and sexual abuse and subsequent depressive and anxiety disorders for two American Indian tribes. *Psychological medicine*. 2005;35(3):329-40.
188. Hussey JM, Chang JJ, Kotch JB. Child maltreatment in the United States: prevalence, risk factors, and adolescent health consequences. *Pediatrics*. 2006;118(3):933-42.
189. Schneider R, Baumrind N, Kimerling R. Exposure to child abuse and risk for mental health problems in women. *Violence Vict*. 2007;22(5):620-31.
190. Afifi TO, Enns MW, Cox BJ, Asmundson GJ, Stein MB, Sareen J. Population attributable fractions of psychiatric disorders and suicide ideation and attempts associated with adverse childhood experiences. *Am J Public Health*. 2008;98(5):946-52.
191. Zlotnick C, Johnson J, Kohn R, Vicente B, Rioseco P, Saldivia S. Childhood trauma, trauma in adulthood, and psychiatric diagnoses: results from a community sample. *Compr Psychiatry*. 2008;49(2):163-9.
192. Bonomi AE, Cannon EA, Anderson ML, Rivara FP, Thompson RS. Association between self-reported health and physical and/or sexual abuse experienced before age 18. *Child abuse & neglect*. 2008;32(7):693-701.
193. Rohde P, Ichikawa L, Simon GE, Ludman EJ, Linde JA, Jeffery RW, et al. Associations of child sexual and physical abuse with obesity and depression in middle-aged women. *Child abuse & neglect*. 2008;32(9):878-87.

194. Draper B, Pfaff JJ, Pirkis J, Snowdon J, Lautenschlager NT, Wilson I, et al. Long-term effects of childhood abuse on the quality of life and health of older people: results from the Depression and Early Prevention of Suicide in General Practice Project. *J Am Geriatr Soc.* 2008;56(2):262-71.
195. Fletcher JM. Childhood mistreatment and adolescent and young adult depression. *Soc Sci Med.* 2009;68(5):799-806.
196. Ritchie K, Jausseant I, Stewart R, Dupuy AM, Courtet P, Ancelin ML, et al. Association of adverse childhood environment and 5-HTTLPR Genotype with late-life depression. *J Clin Psychiatry.* 2009;70(9):1281-8.
197. Polanczyk G, Caspi A, Williams B, Price TS, Danese A, Sugden K, et al. Protective effect of CRHR1 gene variants on the development of adult depression following childhood maltreatment: replication and extension. *Archives of general psychiatry.* 2009;66(9):978-85.
198. Brezo J, Bureau A, Merette C, Jomphe V, Barker ED, Vitaro F, et al. Differences and similarities in the serotonergic diathesis for suicide attempts and mood disorders: a 22-year longitudinal gene-environment study. *Mol Psychiatry.* 2010;15(8):831-43.
199. Cannon EA, Bonomi AE, Anderson ML, Rivara FP, Thompson RS. Adult health and relationship outcomes among women with abuse experiences during childhood. *Violence Vict.* 2010;25(3):291-305.
200. Gal G, Levav I, Gross R. Psychopathology among adults abused during childhood or adolescence: results from the Israel-based World Mental Health Survey. *The Journal of nervous and mental disease.* 2011;199(4):222-9.
201. Ramiro LS, Madrid BJ, Brown DW. Adverse childhood experiences (ACE) and health-risk behaviors among adults in a developing country setting. *Child abuse & neglect.* 2010;34(11):842-55.
202. King DC, Abram KM, Romero EG, Washburn JJ, Welty LJ, Teplin LA. Childhood maltreatment and psychiatric disorders among detained youths. *Psychiatr Serv.* 2011;62(12):1430-8.
203. Jonas S, Bebbington P, McManus S, Meltzer H, Jenkins R, Kuipers E, et al. Sexual abuse and psychiatric disorder in England: results from the 2007 Adult Psychiatric Morbidity Survey. *Psychological medicine.* 2011;41(4):709-19.
204. Teicher MH, Vitaliano GD. Witnessing violence toward siblings: an understudied but potent form of early adversity. *PloS one.* 2011;6(12):e28852.
205. Fujiwara T, Kawakami N. Association of childhood adversities with the first onset of mental disorders in Japan: results from the World Mental Health Japan, 2002-2004. *Journal of psychiatric research.* 2011;45(4):481-7.
206. Chou KL. Childhood sexual abuse and psychiatric disorders in middle-aged and older adults: evidence from the 2007 Adult Psychiatric Morbidity Survey. *J Clin Psychiatry.* 2012;73(11):e1365-71.
207. Sartor CE, Grant JD, Lynskey MT, McCutcheon VV, Waldron M, Statham DJ, et al. Common heritable contributions to low-risk trauma, high-risk trauma, posttraumatic stress disorder, and major depression. *Archives of general psychiatry.* 2012;69(3):293-9.
208. Dunn EC, Gilman SE, Willett JB, Slopen NB, Molnar BE. The impact of exposure to interpersonal violence on gender differences in adolescent-onset major depression: results from the National Comorbidity Survey Replication (NCS-R). *Depress Anxiety.* 2012;29(5):392-9.
209. Gonzalez A, Boyle MH, Kyu HH, Georgiades K, Duncan L, MacMillan HL. Childhood and family influences on depression, chronic physical conditions, and their comorbidity: findings from the Ontario Child Health Study. *Journal of psychiatric research.* 2012;46(11):1475-82.
210. Li N, Ahmed S, Zabin LS. Association between childhood sexual abuse and adverse psychological outcomes among youth in Taipei. *J Adolesc Health.* 2012;50(3 Suppl):S45-51.

211. Warner LA, Alegria M, Canino G. Childhood maltreatment among Hispanic women in the United States: an examination of subgroup differences and impact on psychiatric disorder. *Child Maltreat*. 2012;17(2):119-31.
212. Brown J, Cohen P, Johnson JG, Smailes EM. Childhood abuse and neglect: specificity of effects on adolescent and young adult depression and suicidality. *Journal of the American Academy of Child and Adolescent Psychiatry*. 1999;38(12):1490-6.
213. Thornberry TP, Ireland TO, Smith CA. The importance of timing: the varying impact of childhood and adolescent maltreatment on multiple problem outcomes. *Dev Psychopathol*. 2001;13(4):957-79.
214. Fergusson DM, Boden JM, Horwood LJ. Exposure to childhood sexual and physical abuse and adjustment in early adulthood. *Child abuse & neglect*. 2008;32(6):607-19.
215. Coid J, Petruckevitch A, Chung WS, Richardson J, Moorey S, Feder G. Abusive experiences and psychiatric morbidity in women primary care attenders. *Br J Psychiatry*. 2003;183:332-9; discussion 40-1.
216. Goodwin RD, Fergusson DM, Horwood LJ. Childhood abuse and familial violence and the risk of panic attacks and panic disorder in young adulthood. *Psychological medicine*. 2005;35(6):881-90.
217. Tonmyr L, Williams G, Hovdestad WE, Draca J. Anxiety and/or depression in 10-15-year-olds investigated by child welfare in Canada. *J Adolesc Health*. 2011;48(5):493-8.
218. Walsh K, Danielson CK, McCauley JL, Saunders BE, Kilpatrick DG, Resnick HS. National prevalence of posttraumatic stress disorder among sexually revictimized adolescent, college, and adult household-residing women. *Archives of general psychiatry*. 2012;69(9):935-42.
219. Widom CS. Posttraumatic stress disorder in abused and neglected children grown up. *The American journal of psychiatry*. 1999;156(8):1223-9.
220. Nagy S, DiClemente R, Adcock AG. Adverse factors associated with forced sex among southern adolescent girls. *Pediatrics*. 1995;96(5 Pt 1):944-6.
221. Harrison PA, Fulkerson JA, Beebe TJ. Multiple substance use among adolescent physical and sexual abuse victims. *Child abuse & neglect*. 1997;21(6):529-39.
222. Garnefski N, Diekstra RF. Child sexual abuse and emotional and behavioral problems in adolescence: gender differences. *Journal of the American Academy of Child and Adolescent Psychiatry*. 1997;36(3):323-9.
223. Jantzen K, Ball SA, Leventhal JM, Schottenfeld RS. Types of abuse and cocaine use in pregnant women. *J Subst Abuse Treat*. 1998;15(4):319-23.
224. Bensley LS, Van Eenwyk J, Simmons KW. Self-reported childhood sexual and physical abuse and adult HIV-risk behaviors and heavy drinking. *Am J Prev Med*. 2000;18(2):151-8.
225. Thompson MP, Arias I, Basile KC, Desai S. The association between childhood physical and sexual victimization and health problems in adulthood in a nationally representative sample of women. *J Interpersonal Viol*. 2002;17(10):1115-29.
226. Dube SR, Anda RF, Felitti VJ, Edwards VJ, Croft JB. Adverse childhood experiences and personal alcohol abuse as an adult. *Addict Behav*. 2002;27(5):713-25.
227. Turner C, Russell A, Brown W. Prevalence of illicit drug use in young Australian women, patterns of use and associated risk factors. *Addiction*. 2003;98(10):1419-26.
228. Nichols HB, Harlow BL. Childhood abuse and risk of smoking onset. *J Epidemiol Community Health*. 2004;58(5):402-6.
229. Bergen HA, Martin G, Richardson AS, Allison S, Roeger L. Sexual abuse, antisocial behaviour and substance use: gender differences in young community adolescents. *Aust N Z J Psychiatry*. 2004;38(1-2):34-41.

230. Libby AM, Orton HD, Novins DK, Spicer P, Buchwald D, Beals J, et al. Childhood physical and sexual abuse and subsequent alcohol and drug use disorders in two American-Indian tribes. *J Stud Alcohol*. 2004;65(1):74-83.
231. Bebbington PE, Bhugra D, Brugha T, Singleton N, Farrell M, Jenkins R, et al. Psychosis, victimisation and childhood disadvantage: evidence from the second British National Survey of Psychiatric Morbidity. *Br J Psychiatry*. 2004;185:220-6.
232. Bebbington P, Jonas S, Kuipers E, King M, Cooper C, Brugha T, et al. Childhood sexual abuse and psychosis: data from a cross-sectional national psychiatric survey in England. *Br J Psychiatry*. 2011;199(1):29-37.
233. Kaukinen C, Demaris A. Age at first sexual assault and current substance use and depression. *J Interpers Violence*. 2005;20(10):1244-70.
234. Young SY, Hansen CJ, Gibson RL, Ryan MA. Risky alcohol use, age at onset of drinking, and adverse childhood experiences in young men entering the US Marine Corps. *Arch Pediatr Adolesc Med*. 2006;160(12):1207-14.
235. Nelson EC, Heath AC, Lynskey MT, Bucholz KK, Madden PA, Statham DJ, et al. Childhood sexual abuse and risks for licit and illicit drug-related outcomes: a twin study. *Psychological medicine*. 2006;36(10):1473-83.
236. Trent L, Stander V, Thomsen C, Merrill L. Alcohol abuse among U.S. Navy recruits who were maltreated in childhood. *Alcohol Alcohol*. 2007;42(4):370-5.
237. Al Mamun A, Alati R, O'Callaghan M, Hayatbakhsh MR, O'Callaghan FV, Najman JM, et al. Does childhood sexual abuse have an effect on young adults' nicotine disorder (dependence or withdrawal)? Evidence from a birth cohort study. *Addiction*. 2007;102(4):647-54.
238. Timko C, Sutkowi A, Pavao J, Kimerling R. Women's childhood and adult adverse experiences, mental health, and binge drinking: the California Women's Health Survey. *Subst Abuse Treat Prev Policy*. 2008;3:15.
239. Roberts ME, Fuemmeler BF, McClernon FJ, Beckham JC. Association between trauma exposure and smoking in a population-based sample of young adults. *J Adolesc Health*. 2008;42(3):266-74.
240. Hamburger ME, Leeb RT, Swahn MH. Childhood maltreatment and early alcohol use among high-risk adolescents. *J Stud Alcohol Drugs*. 2008;69(2):291-5.
241. Duncan AE, Sartor CE, Scherrer JF, Grant JD, Heath AC, Nelson EC, et al. The association between cannabis abuse and dependence and childhood physical and sexual abuse: evidence from an offspring of twins design. *Addiction*. 2008;103(6):990-7.
242. Pederson CL, Vanhorn DR, Wilson JF, Martorano LM, Venema JM, Kennedy SM. Childhood abuse related to nicotine, illicit and prescription drug use by women: pilot study. *Psychol Rep*. 2008;103(2):459-66.
243. Jun HJ, Rich-Edwards JW, Boynton-Jarrett R, Austin SB, Frazier AL, Wright RJ. Child abuse and smoking among young women: the importance of severity, accumulation, and timing. *J Adolesc Health*. 2008;43(1):55-63.
244. Chartier MJ, Walker JR, Naimark B. Health risk behaviors and mental health problems as mediators of the relationship between childhood abuse and adult health. *Am J Public Health*. 2009;99(5):847-54.
245. Hayatbakhsh MR, Najman JM, Bor W, Williams GM. Predictors of young adults' amphetamine use and disorders: a prospective study. *Drug Alcohol Rev*. 2009;28(3):275-83.
246. Hughes T, McCabe SE, Wilsnack SC, West BT, Boyd CJ. Victimization and substance use disorders in a national sample of heterosexual and sexual minority women and men. *Addiction*. 2010;105(12):2130-40.



247. Derringer J, Krueger RF, Irons DE, Iacono WG. Harsh discipline, childhood sexual assault, and MAOA genotype: an investigation of main and interactive effects on diverse clinical externalizing outcomes. *Behav Genet.* 2010;40(5):639-48.
248. Chu DC. The Links Between Religiosity, Childhood Sexual Abuse, and Subsequent Marijuana Use: : An Empirical Inquiry of a Sample of Female College Students. *Int J Offender Ther Comp Criminol.* 2011.
249. Vander Weg MW. Adverse childhood experiences and cigarette smoking: the 2009 Arkansas and Louisiana Behavioral Risk Factor Surveillance Systems. *Nicotine Tob Res.* 2011;13(7):616-22.
250. Fuller-Thomson E, Filippelli J, Lue-Crisostomo CA. Gender-specific association between childhood adversities and smoking in adulthood: findings from a population-based study. *Public Health.* 2013.
251. Smith CA, Ireland TO, Thornberry TP. Adolescent maltreatment and its impact on young adult antisocial behavior. *Child abuse & neglect.* 2005;29(10):1099-119.
252. Widom CS, Marmorstein NR, White HR. Childhood victimization and illicit drug use in middle adulthood. *Psychol Addict Behav.* 2006;20(4):394-403.
